# Supplementary material for: Multi-scale, whole-system models of liver metabolic adaptation to fat and sugar in non-alcoholic fatty liver disease
Source: PubMed Central journal article supplement (PMC6102210; doi:10.1038/s41540-018-0070-3), 2018-08-20
Supplement: 41540_2018_70_MOESM1_ESM.pdf [file 41540_2018_70_MOESM1_ESM.pdf]

## SUPPLEMENTARY INFORMATION

Multi-scale, whole-system models of liver metabolism adaptation to fat and sugar in non-alcoholic fatty liver disease.

Maldonado EM, Fisher CP, Mazzatti DJ, Barber AL, Tindall MJ, Plant NJ, Kierzek AM & Moore JB<sup>1</sup>.

<sup>1</sup>Corresponding Author: J. Bernadette Moore [j.b.moore@leeds.ac.uk](mailto:j.b.moore@leeds.ac.uk)

|                                                                                       |    |
|---------------------------------------------------------------------------------------|----|
| SUPPLEMENTARY METHODS .....                                                           | 2  |
| SUPPLEMENTARY FIGURES .....                                                           | 9  |
| <b>Figure S1.</b> Modelling strategy overview .....                                   | 9  |
| <b>Figure S2.</b> The multi-scale model of hepatic monosaccharide metabolism.....     | 10 |
| <b>Figure S3.</b> Import and validation of the insulin kinetic model into QSSPN. .... | 11 |
| <b>Figure S4.</b> The QSSPN gene expression model .....                               | 12 |
| <b>Figure S5.</b> Adjacency matrix heatmap .....                                      | 13 |
| <b>Figure S6.</b> An unregulated exchange set heatmap. ....                           | 14 |
| <b>Figure S7.</b> 24 hour <i>in vitro</i> PPAR $\alpha$ inhibitor experiments. ....   | 15 |
| <b>Figure S8</b> Cell viability of fatty acid treatment controls.....                 | 16 |
| SUPPLEMENTARY TABLES .....                                                            | 17 |
| <b>Table S1.</b> Hepatocyte key assumptions.....                                      | 17 |
| <b>Table S2.</b> HepG2 macromolecular composition. ....                               | 18 |
| <b>Table S3.</b> HepatoNet1 modifications.....                                        | 19 |
| <b>Table S4.</b> External metabolite exchange set.....                                | 20 |
| <b>Table S5.</b> Generic biomass function used for simulations .....                  | 22 |
| <b>Table S6.</b> Custom primer sequences .....                                        | 24 |
| <b>Table S7</b> Target genes and mediated hepatic reactions .....                     | 25 |
| REFERENCES .....                                                                      | 51 |

## SUPPLEMENTARY METHODS

### Multi-Scale Model of Hepatic Monosaccharide Metabolism Reconstruction and QSSPN Simulation

The multi-scale model of the regulation of sugar uptake and its effect on global hepatocyte metabolism is composed of a fully parameterised ordinary differential equation (ODE) model of insulin signalling<sup>1</sup> and a hepatic genome scale metabolic network (GSMN)<sup>2</sup> constrained by consumption and release flux bounds derived from a metabolomics *in vitro* study.<sup>3</sup>

A Petri net formalism was used to represent the signalling network composed of monosaccharide transport and insulin signalling (**Fig. S2**). Reconstruction was performed with the Petri net editor software Snoopy 2 and run on Mac OS X; v1.13, build Apr 1, 2014.<sup>4</sup> Utilising the extended Petri net class, compounds were represented by places (circles), while transitions (squares) represented interactions in the model. Quasi steady-state Petri nets (QSSPN)<sup>5</sup> were used to connect molecular interactions that occur over different time scales. Fast metabolic interconversions represented as quasi steady-state fluxes (QSSF; HepatoNet1, **Fig. S2A**); and slower gene and signalling regulatory networks represented as dynamic transitions (DT; Petri net network, **Fig. S2B-F**). Constraint places in the DT set the flux bounds in the metabolic network through an activity list linking the number of tokens in the place to upper and lower bounds for specified reactions within the GSMN. Constraint places were also used to link qualitative and quantitative aspects of the DT (e.g. G6Pase). Transitions can be used to define the reaction rate constant for a reaction through the 'RATE' comment, with a rate of 1 being used as default if this is not present. In addition, the 'FLUX' comment can be used to extract real flux values from the simulated solution;<sup>6</sup> these transitions are indicated as red rectangles within **Figure S2**. Standard (point-ended arrows) and read (circle-ended arrows) edges were used to simulate consumption or catalyzation of the interactions, respectively. Edges were tagged to specify the activity of the pre-place, e.g. 'ACTIVITY 0' followed by 'END' denotes mass action activity. To represent *in vivo*-like transportation of glucose and fructose, Michaelis–Menten kinetics (**Eq. 1**) were utilised to calculate the fluxes within the activity list of the monosaccharide constraint places, such that

$$v = \frac{V_{max}[S]}{K_M + [S]}, \quad \text{Eq. 1}$$

where  $v$  is the rate of the reaction,  $V_{max}$  is the maximum rate possible for the reaction,  $[S]$  is the substrate concentration and  $K_M$  is the Michaelis–Menten constant which is unique to each substrate.

The  $V_{max}$  was set at 5 mmol/g DW/h for both glucose and fructose based on favouring whole cell uptake, rather than recombinant systems.<sup>7,8,9,10</sup> HepG2 cells are known to express more than one glucose transporter, e.g. GLUT1, GLUT2, GLUT3 and GLUT9,<sup>11,12,13,14</sup> but not

the main fructose transporter, GLUT5.<sup>12,15</sup> Glucose transport is symmetrical.<sup>9</sup> Therefore, the activity list for glucose and fructose transport constraint places are symmetrical in regards to the maximal import and export rates represented as lower and upper bounds, respectively. Monosaccharide transport rates<sup>7,8,10</sup> were converted to mmol/g DW/h based on assumptions outlined in **Table S1** and **Table S2**. The Michaelis–Menten constants were set at 17 mM for glucose and 66 mM for fructose based on GLUT2 transport properties as it is the predominate glucose and fructose transporter in hepatocytes.<sup>11,16,17</sup> Extrapolating from a Michaelis–Menten curve based upon these kinetic values, 30 activity step thresholds were generated. This ensures a high resolution over the substrate concentration range of 0 - 25 mM for each monosaccharide, which corresponds to the concentrations used during *in vitro* experimentation.

This unregulated model was expanded to include a regulatory signalling pathway through the integration of a model of insulin signalling<sup>1</sup> downloaded from BioModels (ID: MODEL1204060000, SBML L2 V4).<sup>18</sup> The kinetic insulin model was first implemented in COmplex PATHway Simulator (COPASI)<sup>19</sup> and simulated on a Mac OS X; v4.15, Build 95 to ensure the model could successfully replicate the behaviours reported in the original paper. Briefly, simulations were carried out as a deterministic (LSODA) time course over a duration of 480 minutes. COPASI time course simulations (**Fig. S3B**) resulted in similar behaviour as seen in the original publication (**Fig. S3A**). The insulin model was converted into a Petri net formalism using Snoopy (**Fig. S2F**). Large places denoted signalling molecules, medium sized places represent reaction rates and the smallest places represent degradation. Places that are shaded grey represent clones of individual places to enhance visualisation: all clones for a single entity contain the same concentration/flux. Transitions were labelled as the reaction rate IDs in the original publication, and were parametrised by their pre-place. The insulin model simulated in QSSPN was consistent with the model simulated in COPASI, producing identical results (**Fig. S3B, C**).

The kinetic insulin model was then coupled with the HepatoNet1 GSMN. Within the original kinetic insulin model, only one gene product had a direct link to a metabolic reaction in HepatoNet1: G6Pase (r0396,  $\text{H}_2\text{O}(\text{r}) + \text{Glucose-6P}(\text{r}) \rightarrow \text{Glucose}(\text{r}) + \text{Pi}(\text{r})$ ). To enhance the regulatory connection between the insulin regulatory network and the metabolic network, phosphorylated glycogen synthase kinase (pGSK)3 $\beta$  was designated as the active glycogen synthase (GYS; r1388,  $3 \text{ UDP-glucose}(\text{c}) + \text{Glycogenin-G8}(\text{c}) \rightarrow \text{Glycogenin-G11}(\text{c}) + 3 \text{ UDP}(\text{c})$ ).<sup>20,21</sup> Comments in the original publication also noted that another compound, phosphoenolpyruvate carboxykinase (PEPCK), had a similar behaviour to G6Pase but it was not included in the original kinetic model.<sup>21,22</sup> Therefore, the activity of G6Pase was used to represent the activity of PEPCK and connected with HepatoNet1 reactions r0123-4 for both

cytosolic (c) and mitochondrial (m) compartments of reaction;  $\text{GTP} + \text{OAA} \rightarrow \text{GDP} + \text{PEP} + \text{CO}_2$ .

The HepatoNet1 GSMN,<sup>2</sup> representing human liver whole-cell metabolism, was downloaded from the BioModels database (MODEL1009150000, SBML L2 V4).<sup>23</sup> All fluxes were checked to ensure the direction of reactions in the stoichiometric matrix. All reversible fluxes were adjusted to a minimum flux of -1 and a maximum flux of 1; irreversible reaction fluxes were adjusted to 0 to 1 or -1 to 0 depending on directionality.

Specific adjustments were made to HepatoNet1 to better detail metabolic pathways of interest accurately. The polyol pathway was included as this has been found to be a potential influence on the development of hepatic steatosis<sup>24</sup> and is part of fructose metabolism in the liver.<sup>25</sup> Namely, HepatoNet1 reaction IDs: r0206 (ketohexokinase, KHK, EC 2.7.1.3), r0252 (trio kinase, TRIOK, EC 2.7.1.28), and r0554 (adolase B, ALDOB, EC 4.1.2.13) were adjusted as shown in **Table S3**. In addition, a metabolite, sorbitol, sorbitol dehydrogenase (SORD) and aldo-keto reductase family 1, member B1 (AKR1B1) reactions were added to represent the polyol pathway. The hepatic protein (protein score) and RNA (fragments per kilobase of exon per million fragments mapped, FPKM) expression of SORD and AKR1B1 in human liver were confirmed by expression data from Human Protein Atlas<sup>26</sup> and HepG2 cells. A reaction was also added to represent the hepatic fructose sodium co-transport reaction.<sup>27</sup> Thus, the total number of metabolites is 778 and the total number of reactions is 2542 within the modified GSMN.

A biomass function was used as a simulation constraint to ensure the presence of the essential building blocks (amino acids, nucleoside triphosphates and deoxynucleotide triphosphates) for biomass were available; representing the basic metabolic requirements of a human cell. This function was adapted based on a published whole human metabolism GSMN, Recon 2, biomass<sup>28</sup> (**Table S5**). FBA simulations before and after the modifications listed above, and using the same external metabolite constraints (**Table S3**), were performed: BIOMASS optimal maximisation flux was not altered by the modifications:  $\text{FBA} = 0.03152$ . Biomass doubling time estimations for HepG2 cells range from approximately 20 to 60 hours.<sup>29,30,31,32</sup> To reflect this, the BIOMASS lower and upper flux bounds were set at 0.01666667 and 1000.0, respectively, representing a minimal doubling time of 60 hours.

Additional constraints were included to represent the physiologically relevant kinetic activity of the first steps of glucose and fructose metabolism. Flux constraints (mmol/g DW/hour) were set as a ratio of fluxes. As a conservative measure, flux ratio assumptions were based on a hexokinase Michaelis-Menten constant  $K_M$  for glucose and fructose phosphorylation at carbon-6, as hexokinase II is the most likely expressed hexokinase in HepG2 cells.<sup>14</sup> The hexokinase  $K_M$  for glucose and fructose phosphorylation were estimated

as 0.047 mM and 11.5 mM, respectively.<sup>33</sup> Thus, hexokinase II flux ratio is set for the phosphorylation of glucose specific reactions (r0353-5) at 1, and reactions specific to fructose phosphorylation (r0356-8) was set at 0.005. The polyol pathway flux was also adjusted. The  $K_M$  for glucose phosphorylation by hexokinase was estimated to be 0.047 mM, while the  $K_M$  of the first reaction in the polyol pathway by aldose reductase enzyme was estimated as 65.8 mM.<sup>34,35,36</sup> Thus, hexokinase phosphorylation of glucose was set as 1 (as above) and the flux of the reaction specific to AKR1 was set as  $7.14 \times 10^{-4}$ . For computational purposes, the TAG production reaction (r1223) was adjusted as a positive flux as QSSPN simulations can only maximise positive objective function flux values. Additionally, TAG production reaction (r1223) lower and upper bound values were set as 0 and 10, respectively, so as not to mask the optimisation flux if above 1.

To represent the nutrient composition of the culture medium, transport reactions were included as an external exchange set. The HepatoNet1 physiological import and physiological export set (PIPES) was modified to represent the nutrient composition of cell culture medium as shown in **Table S4**. The fluxes of the external metabolite set were constrained by setting the lower and upper bound fluxes as the maximum consumption and release rates derived from the NCI-60 cell lines consumption and release of metabolites dataset (CORE)<sup>3</sup>, respectively, as previously done in<sup>37</sup>.

### **Model Simulation**

The QSSPN algorithm integrates QSSF set by the metabolic network with DT represented by the Petri net network.<sup>5,6</sup> QSSF and DT interaction sets are connected by two classes of Petri net places: constraint places set flux bounds in QSSF, translating place status into flux bounds; objective places represent metabolic outputs of the QSSF network. Specialised transitions are introduced as FLUX transitions so to extract flux values from simulation solutions. The QSSF is the metabolic network, i.e. HepatoNet1, represented as a stoichiometric matrix of which during simulation, the network is constrained by mass balance and ultimately is at steady-state at each time step during the simulation. While the quantitative bounds substantially limit solution space,<sup>37</sup> alternative flux distributions within the whole-cell metabolic model are possible. To evaluate a full range of quantitative model behaviours, we formulated a dynamic Flux Variability Analysis (dFVA) protocol (shown below), applying for the first time the well-established Flux Variability Analysis<sup>38</sup> in a quasi-steady state dynamic simulation. A dFVA simulation produces two time courses corresponding to the maximal and minimal value of a reaction flux that can sustain the maximal value of the metabolic capability (objective function) under investigation. This provides insight into model behaviours that are feasible (and not feasible) given the knowledge represented in the ODE model, stoichiometric

model (GSMN) and the consumption/release constraints. Comparison of the dFVA results with experimental data thus evaluates the extent to which current molecular mechanistic knowledge recapitulates observed system dynamics. In summary, the model presents a novel method, dFVA.

The dFVA approach employs the following steps:

- i. Calculate the constraint and the objective nodes;
- ii. Update the metabolic model accordingly to (1);
- iii. Optimise the metabolic model using *maximum* optimisation dFBA;
- iv. Update the Petri net objective node according to the new objective;
- v. Repeat (1-4) until simulation time has ended; and
- vi. Repeat (1-5), except using *minimum* optimisation dFBA for step 3.

The majority of dFVA simulations were run with a maximal time step of 0.01. However, this proved to be computationally expensive when simulating the integrated model of insulin and HepatoNet1 optimising for TAG production (as the objective function). Therefore, this setting was adjusted to 0.1. Under these conditions, simulations were still of sufficiently high resolution to allow for examination of the network behaviour.

### ***Sugar Consumption Assay***

Sugar consumption was monitored by sampling culture media over time and quantified by using glucose and fructose assay kits (Abcam, UK). Both glucose and fructose were stable in medium over the experimental period, and no extracellular degradation was expected. The disappearance of monosaccharide from the medium is highly suggestive and was regarded as cellular uptake and consumption. Briefly, medium or diluted medium (medium:assay buffer, 1:4, v/v) was diluted with assay buffer (1:24, v/v). The prepared medium was then incubated with glucose reaction mix (assay buffer: probe: enzyme mix, 23:1:1, v/v/v) or fructose reaction mix (assay buffer: probe: enzyme mix: fructose converting enzyme, 18:1:1:5, v/v/v/v) at a 1:1 (v/v) ratio mixture for 30 minutes or 1 hour, respectively, in darkness at 37°C. Absorbance for both assays were read at 570nm by a multi-mode plate reader (BMG LABTECH, Germany).

### ***Insulin Sensitivity by pAKT***

Cells were lysed with radioimmunoprecipitation assay buffer containing ×1 Halt™ protease and phosphatase inhibitor cocktail. Protein concentrations were determined by bicinchoninic acid (BCA) assay (Fisher Scientific, UK). As a positive and negative control for pAKT detection, AKT control cell extracts (New England Biolabs Ltd, UK) were included. Proteins

were separated by molecular weight via sodium dodecyl sulphate - polyacrylamide gel electrophoresis (SDS-PAGE). Gels containing 6% acrylamide/bis [37.5:1] for stacking and 12% for resolving were loaded with 20 µg of protein per lane, and resolved for 1 hour at 180 V. Proteins were wet-transferred onto PVDF membranes for 2 hours at 300 mA. Membranes were blocked with 0.1% BSA in tris-buffered saline (TBS) for 1 hour at room temperature. Blots were then probed with primary rabbit anti-pAKT (Ser473, D9E) and mouse anti-AKT (pan, 40D4), both at 1:2000 (New England Biolabs, UK) in TBS-0.2% Tween® 20 (T) overnight at 4°C. After washing for 5 minutes thrice (washing buffer: TBS-0.1% T), blots were probed with donkey anti-mouse IRDye 680RD and donkey anti-rabbit IRDye 800CW at 1:10000 (LI-COR Biosciences, UK) in TBS-0.2% T-0.01% SDS for 1 hour at room temperature in darkness. Membranes were washed again with washing buffer for 5 min thrice in darkness, rinsed twice with TBS and air-dried in darkness prior to blot visualisation on LI-COR ODYSSEY CLx (LI-COR Biosciences, UK) and quantified by Image Studio v3.1, software v1.0.11.

## **PPAR $\alpha$ Regulome Reconstruction and QSSPN Simulation**

### ***Pathway Enrichment Analysis***

Enriched pathways ( $P < 0.05$ ), within the transcriptomics and proteomics datasets described below, were identified against the KEGG<sup>39</sup> and BIOCARTA<sup>40</sup> databases using the DAVID<sup>41</sup> online bioinformatics suite. Results from these analyses were systematically combined and quantitatively represented using a hive plot formalism.<sup>42</sup>

### ***Transcriptomics***

Microarray experiments were performed as previously described.<sup>43</sup> Briefly, Huh7 cells were incubated with 100 µM or 200 µM of palmitic acid in serum-free DMEM for 24 hours. Cells were homogenised in Trizol (ThermoFisher, UK) and total RNA isolated as per the manufacturer's instructions. Total RNA quantity and purity was assessed by absorbance spectroscopy ( $\lambda$  260nm, 280nm and 230nm); integrity was confirmed using the Agilent 2100 bioanalyser and the RNA 600 LabChip kit prior to hybridisation to human gene expression microarrays (Agilent Technologies, UK). Differential expression of genes ( $\geq 1.5$  fold relative to controls,  $P < 0.05$ ) were identified in both treatment groups and taken forward for pathway enrichment analysis.

### ***Proteomics***

Details of the *in vivo* proteomics study have been described in detail elsewhere.<sup>44</sup> Briefly, C57BL6 and APOE $^{-/-}$  mice were fed either high-fat or normal chow diets for 12 weeks after

which animals were sacrificed, livers were resected, homogenised and protein isolated and enriched for cytoplasmic and membrane proteins. Fractionated samples were iTRAQ labelled for proteomics analysis by mass spectrometry. Proteins identified as being differentially expressed (relative to wild-type animals fed a normal diet) were carried forward for pathway enrichment analysis.

### ***PPAR $\alpha$ Model Simulation***

Simulation of the PPAR $\alpha$  model was performed as previously published<sup>5</sup> with the exception for updates to the gene expression model (**Fig. S4**), the biomass function (**Table S5**), and exchange set (**Table S4**) detailed herein.



## SUPPLEMENTARY FIGURES

FIGURE S1

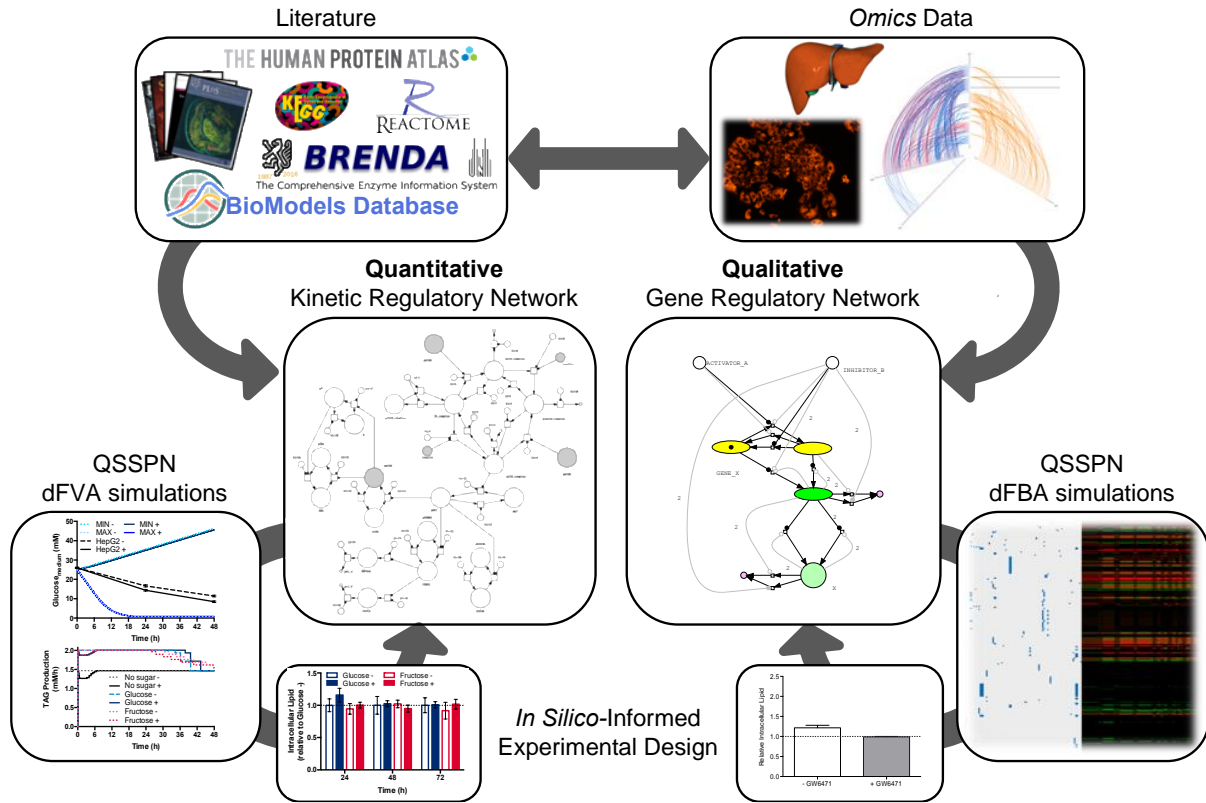

**Figure S1.** Modelling strategy overview. The computational model construction incorporates information from both in-house experimental data and literature. Although not exclusively, literature-based data was incorporated into our quantitative kinetic regulatory network, while in-house omics data was also used to aid the qualitative gene regulatory network construction. The quantitative and qualitative model is simulated to deliver outputs that can be used to compare to and/or inform experimental results. This is an iterative modelling approach as experimental results can then be used to update model design to deliver predictions more representative of known biology.



FIGURE S3

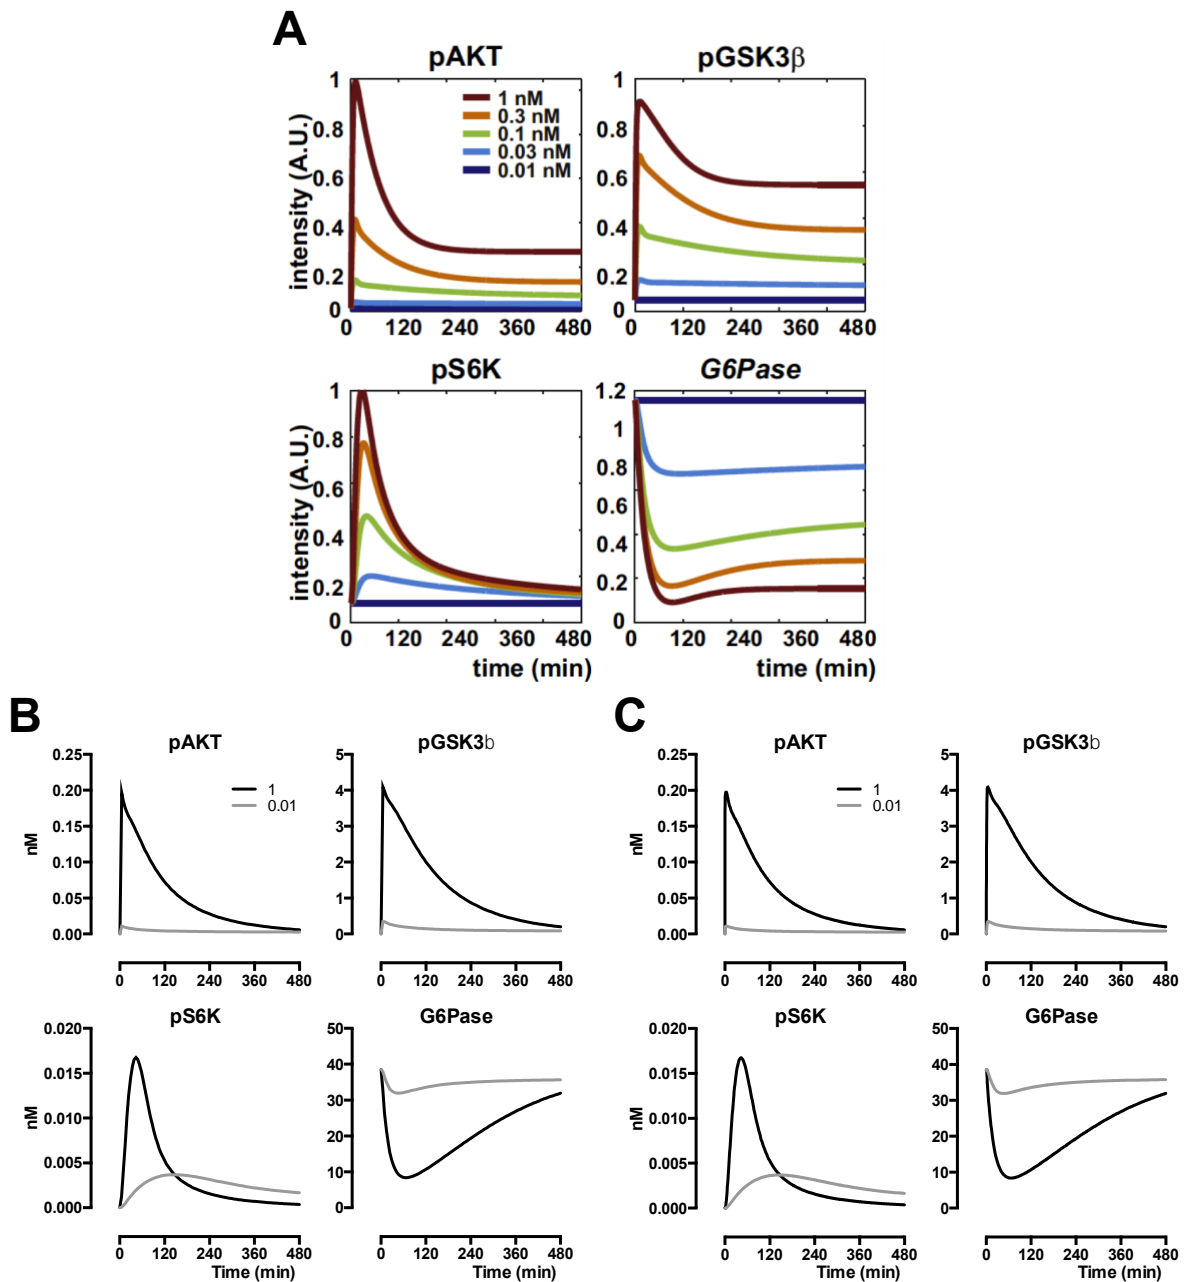

**Figure S3.** Import and validation of the insulin kinetic model into QSSPN. **A** Simulation results as presented from the original publication<sup>1</sup>, and the results of the same kinetic model ran in **B** COPASI and **C** QSSPN with no notable differences between the simulations.

FIGURE S4

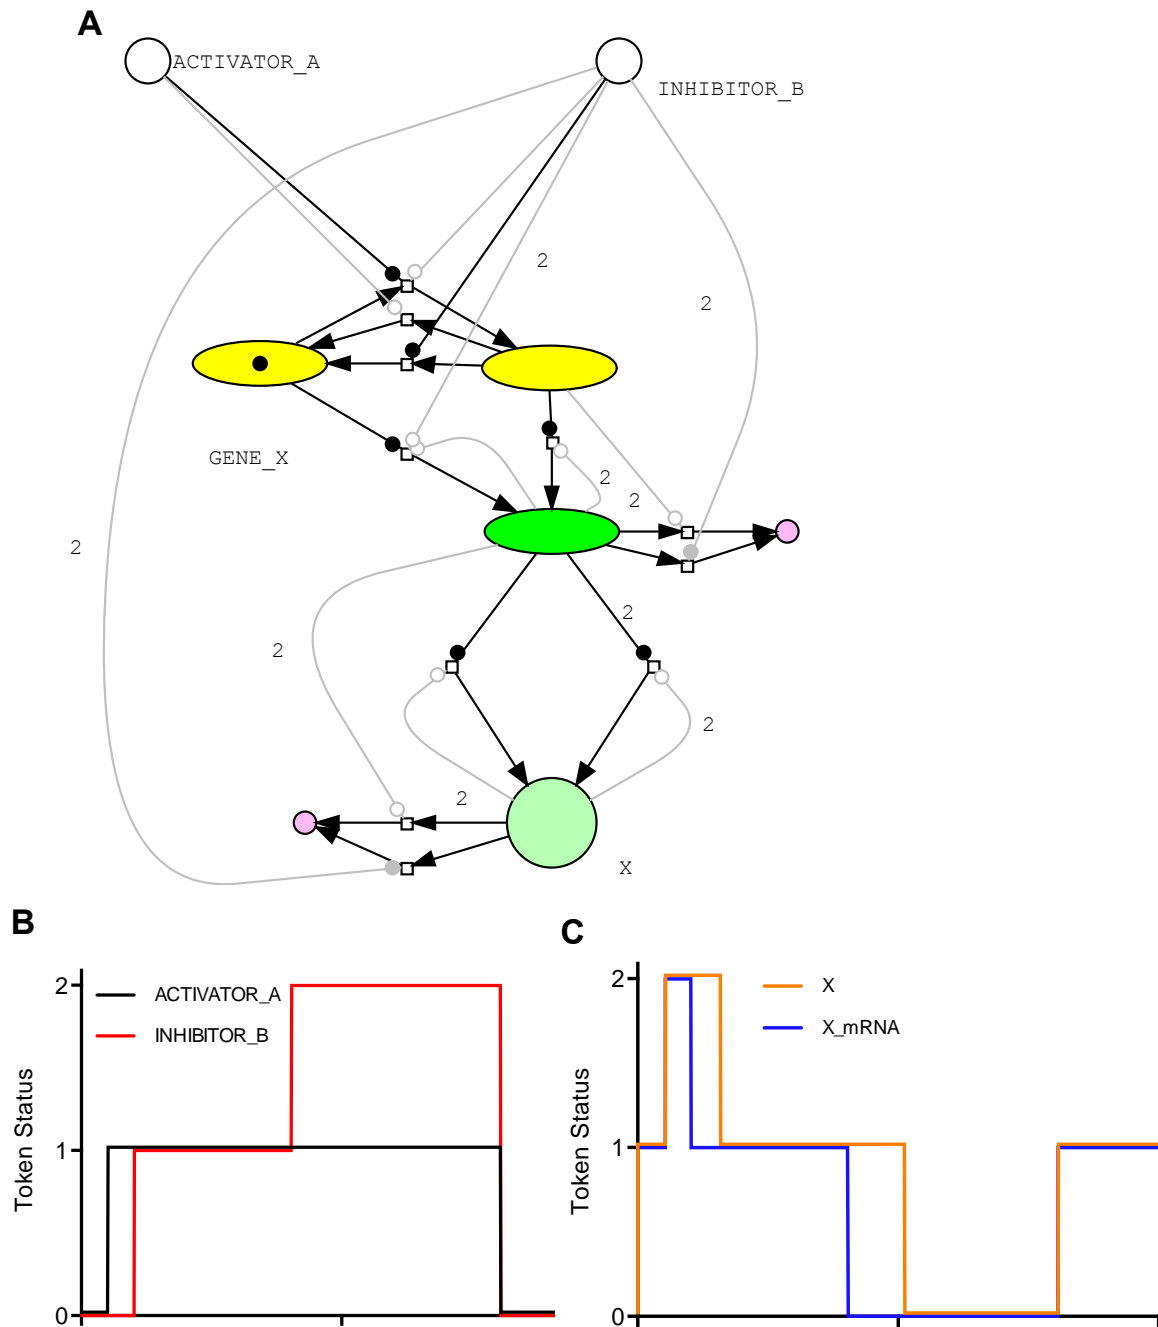

**Figure S4.** The QSSPN gene expression model simulating regulation of the expression of a hypothetical gene 'X'. **A** The gene expression model represented as an extended Petri net formalism incorporating systems biology graphical notation; **B** Token status of 'Activator\_A' and 'Inhibitor\_B' place nodes over simulated trajectory; **C** Expression of a hypothetical gene 'X' at the transcript and protein level over a simulated trajectory in response to activator and inhibitor status.

FIGURE S5

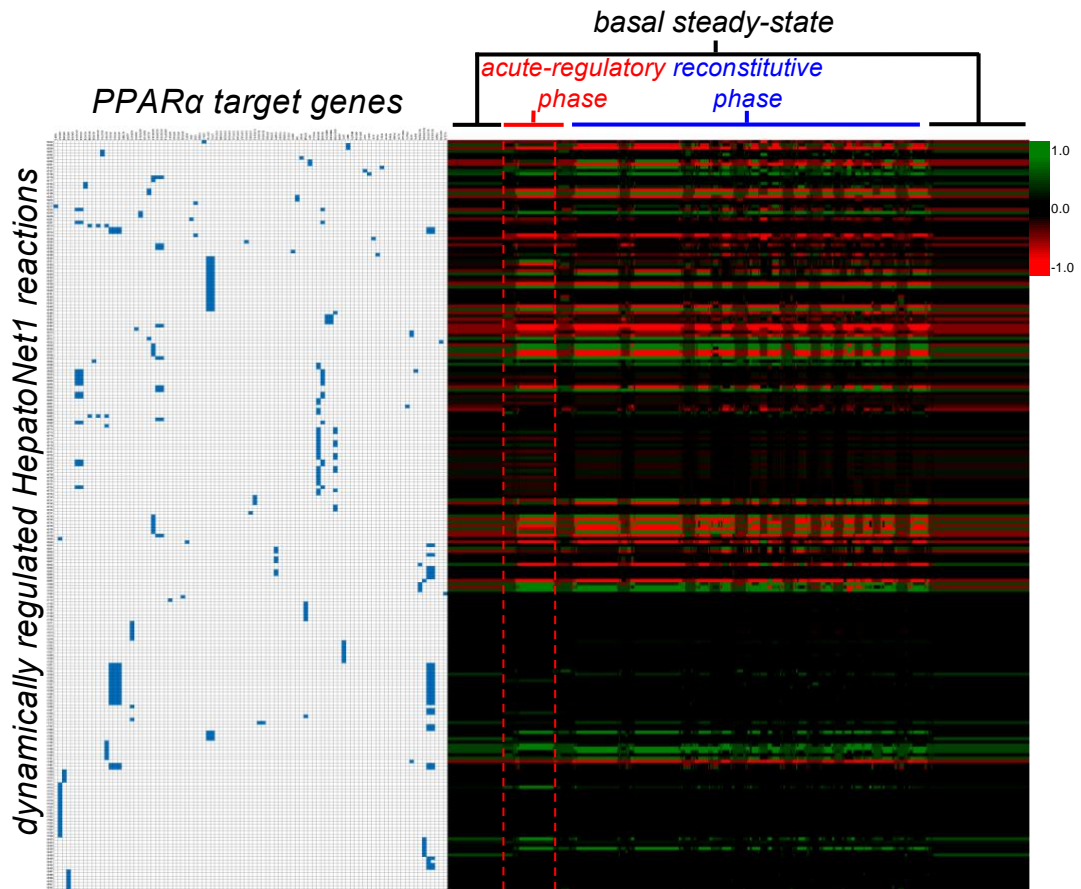

**Figure S5.** Adjacency matrix heatmap showing the reconstructed PPAR $\alpha$  regulome connected to HepatoNet1 metabolic network fluxes and a single, representative simulated trajectory. The left panel indicates the mapping between the 91 PPAR $\alpha$  target genes (alphabetical from left to right and per **Table S7**) and the 233 metabolic/transport reactions within the GSMN their encoded proteins catalyze. The right panel indicates flux through each reaction over the course of a simulation. Positive flux values are shown in green, negative flux values in red with simulated time progressing left to right; the simulated fatty acid treatment is indicated by the dashed redlines (TX window).

FIGURE S6

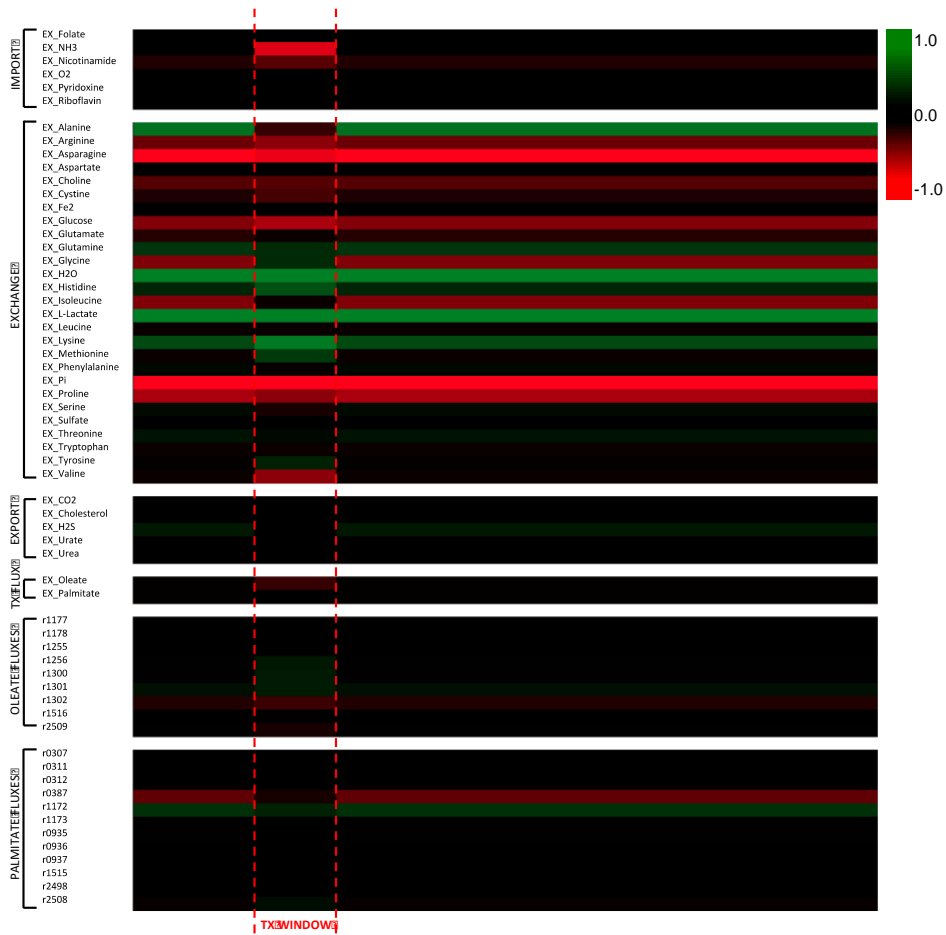

**Figure S6.** An unregulated exchange set heatmap. A single; single simulated trajectory heatmap of exchange set fluxes, treatment fluxes and all fluxes where palmitate and oleate are primary metabolites or products. Positive flux values are shown in green, negative flux values in red with simulated time progressing left to right; simulated fatty acid treatment is indicated by the dashed redlines (TX window). For these simulations, the PPAR $\alpha$  regulome was disabled by setting the token status of the PPAR $\alpha$  gene node to 0. As a result, PPAR $\alpha$  is not expressed within the model and all target genes are permanently fixed at basal expression levels.

**FIGURE S7**

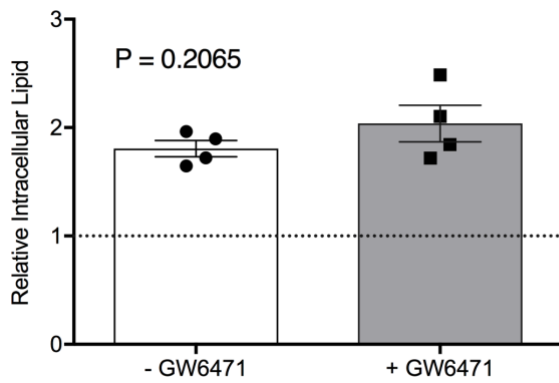

**Figure S7.** 24 hour *in vitro* PPAR $\alpha$  inhibitor experiments. Relative intracellular lipid levels as quantified by Nile red fluorescence in HepG2 cells treated with 400  $\mu$ M oleic acid for 24 hours  $\pm$  PPAR $\alpha$  antagonist GW6471 mean  $\pm$  SEM (n=4) relative to vehicle and analysed using a two-tailed t-test with Welch's correction.

FIGURE S8

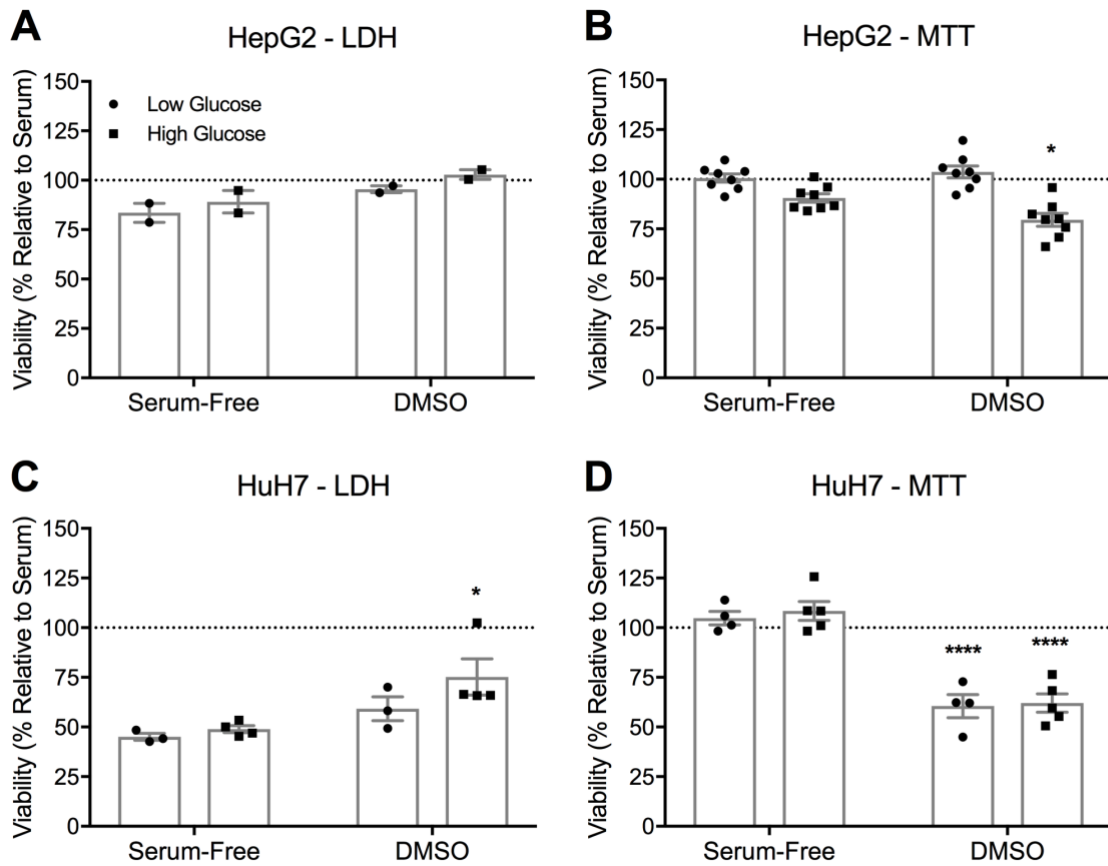

**Figure S8** Cell viability of fatty acid treatment controls. Cell viability was detected by LDH (**A** and **C**) and MTT (**B** and **D**) assays in both HepG2 (**A** and **B**) and HuH7 cells (**C** and **D**) cultured in low (grey) or high (black) glucose DMEM after 24 h in serum-free or added 2 % DMSO. HepG2 viability by LDH (n=2) and MTT (n=8); HuH7 by LDH in low (n=3) and high (n=4) glucose; HuH7 by MTT in low (n=4) and high (n=5) glucose. Data are relative to serum cultured cells set at 100 % (dotted line) and shown as mean  $\pm$  SEM. Two-way ANOVA with Bonferroni's test post hoc was used to detect differences between serum-free and added 2% DMSO treated cells with statistical significance indicated by \*  $P < 0.05$  and \*\*\*\*  $P < 0.0001$ .



**SUPPLEMENTARY TABLES****TABLE S1****Table S1.** Hepatocyte key assumptions.

| <b>Description</b>               | <b>Estimations</b>          |
|----------------------------------|-----------------------------|
| Dimension                        | 15 $\mu\text{m}^3$          |
| Volume                           | 3.375 x 10 <sup>-9</sup> mL |
| Density                          | 1.03 g/mL                   |
| Total cell weight                | 3.476 ng                    |
| Dry weight<br>(1/3 total weight) | 1.1588ng                    |
| Wet weight<br>(2/3 total weight) | 2.25 pL                     |

Estimations based on<sup>45</sup> and Table S2.

**TABLE S2****Table S2.** HepG2 macromolecular composition.

| <b>Macromolecules</b> | <b>% of dry weight</b> |
|-----------------------|------------------------|
| DNA                   | 3.9                    |
| RNA                   | 2.4                    |
| Carbohydrates         | 3.4                    |
| Lipids                | 18.0                   |
| Proteins              | 61.4                   |
| Rest                  | 10.9                   |

Composition was sourced from.<sup>46</sup>

**TABLE S3****Table S3.** HepatoNet1 modifications.

| <b>Modified reactions</b> |                                                                                                                                   |                                                              |             |
|---------------------------|-----------------------------------------------------------------------------------------------------------------------------------|--------------------------------------------------------------|-------------|
| ID                        | HepatoNet1 Reaction                                                                                                               | Modified Reaction                                            |             |
| r0206                     | ATP(c) + Fructose(c) $\leftarrow$ ADP(c) + Fructose-1P(c)                                                                         | ATP(c) + Fructose(c) $\rightarrow$ ADP(c) + Fructose-1P(c)   |             |
| r0252                     | ATP(c) + Glyceraldehyde(c) $\leftrightarrow$ ADP(c) + GAP(c)                                                                      | ATP(c) + Glyceraldehyde(c) $\rightarrow$ ADP(c) + GAP(c)     |             |
| r0554                     | Fructose-1P(c) $\rightarrow$ DHAP(c) + Glyceraldehyde(c)                                                                          | Fructose-1P(c) $\leftrightarrow$ DHAP(c) + Glyceraldehyde(c) |             |
| <b>Added reactions</b>    |                                                                                                                                   |                                                              |             |
| ID                        | Reaction                                                                                                                          |                                                              |             |
| r9000                     | Glucose(c) + NADPH(c) $\rightarrow$ NADP(c) + Sorbitol(c)                                                                         |                                                              |             |
| r9001                     | NAD(c) + Sorbitol(c) $\rightarrow$ Fructose(c) + NADH(c)                                                                          |                                                              |             |
| r9002                     | Fructose(s) + Na <sup>+</sup> (s) $\rightarrow$ Fructose (c) + NA <sup>+</sup> (c)                                                |                                                              |             |
| <b>Constrained fluxes</b> |                                                                                                                                   |                                                              |             |
| ID                        | HepatoNet1 Reaction                                                                                                               | Lower Bound                                                  | Upper Bound |
| r0356                     | Fructose(c) + ATP(c) $\rightarrow$ Fructose-6P(c) + ADP(c)                                                                        | 0.0                                                          | 0.005       |
| r0357                     | Fructose(c) + ATP(c) $\rightarrow$ Fructose-6P(c) + IDP(c)                                                                        | 0.0                                                          | 0.005       |
| r0358                     | Fructose(c) + ATP(c) $\rightarrow$ Fructose-6P(c) + dADP(c)                                                                       | 0.0                                                          | 0.005       |
| r9000                     | Glucose(c) + NADPH(c) $\rightarrow$ NADP(c) + Sorbitol(c)                                                                         | 0.0                                                          | 0.000714    |
| r1223                     | Acyl-CoA-VLDL-TG3-pool(c) + 1,2-Diacylglycerol-VLDL-TG-pool(c) $\rightarrow$ Triacylglycerol-VLDL-pool(c) + CoA(c)                | 0.0                                                          | 10.0        |
| r1224                     | Triacylglycerol-VLDL-pool(c) + H <sub>2</sub> O(c) $\rightarrow$ Fatty-acid-VLDL-TG3-pool(c) + 1,2-Diacylglycerol-VLDL-TG-pool(c) | 0.0                                                          | 10.0        |

Abbreviations: cytosol (c), sinusoidal space (s), glyceraldehyde 3-phosphate (GAP), dihydroxyacetone phosphate (DHAP), triacylglycerol (TG). The HepatoNet1 modifications were also used in Maldonado *et al.* (2017).<sup>37</sup>

**TABLE S4****Table S4.** External metabolite exchange set.\*

| Reaction ID               | Reaction                    | Lower Bound | Upper Bound | Description          |
|---------------------------|-----------------------------|-------------|-------------|----------------------|
| EX_H2O                    | HC00011_s =<br>HC00011_s_xt | -1.0        | 1.0         | H2O exchange         |
| EX_O2                     | HC00017_s =<br>HC00017_s_xt | -1.0        | 0.0         | O2 import            |
| EX_Pi                     | HC00019_s =<br>HC00019_s_xt | -1.0        | 1.0         | Pi exchange          |
| EX_CO2                    | HC00021_s =<br>HC00021_s_xt | 0.0         | 1.0         | CO2 export           |
| EX_NH3                    | HC00024_s =<br>HC00024_s_xt | -1.0        | 0.0         | NH3 import           |
| EX_Alanine                | HC00048_s =<br>HC00048_s_xt | -0.005500   | 0.130813    | Alanine exchange     |
| EX_Arginine               | HC00065_s =<br>HC00065_s_xt | -0.070285   | 0.005786    | Arginine exchange    |
| EX_Asparagine             | HC00148_s =<br>HC00148_s_xt | -0.037002   | 0.005679    | Asparagine exchange  |
| EX_Aspartate              | HC00055_s =<br>HC00055_s_xt | -0.017289   | 0.016442    | Aspartate exchange   |
| EX_Cystine <sup>1</sup>   | HC00389_s =<br>HC00389_s_xt | -0.608543   | 0.193094    | Cystine exchange     |
| EX_Glutamate              | HC00034_s =<br>HC00034_s_xt | -0.007645   | 0.193094    | Glutamate exchange   |
| EX_Glutamine              | HC00067_s =<br>HC00067_s_xt | -0.608543   | -0.027744   | Glutamine import     |
| EX_Glycine                | HC00045_s =<br>HC00045_s_xt | -0.011301   | 0.023408    | Glycine exchange     |
| EX_Histidine <sup>1</sup> | HC00133_s =<br>HC00133_s_xt | -0.608543   | 0.193094    | Histidine exchange   |
| EX_Isoleucine             | HC00334_s =<br>HC00334_s_xt | -0.043197   | -0.002126   | Isoleucine import    |
| EX_Leucine                | HC00121_s =<br>HC00121_s_xt | -0.052230   | -0.003955   | Leucine import       |
| EX_Lysine                 | HC00053_s =<br>HC00053_s_xt | -0.038469   | -0.005086   | Lysine import        |
| EX_Methionine             | HC00075_s =<br>HC00075_s_xt | -0.014031   | -0.001399   | Methionine import    |
| EX_Phenylalanine          | HC00081_s =<br>HC00081_s_xt | -0.014610   | -0.001669   | Phenylalanine import |
| EX_Proline                | HC00145_s =<br>HC00145_s_xt | -0.002389   | 0.011564    | Proline exchange     |
| EX_Serine                 | HC00068_s =<br>HC00068_s_xt | -0.067881   | -0.004097   | Serine import        |
| EX_Threonine              | HC00179_s =<br>HC00179_s_xt | -0.024476   | -0.002757   | Threonine import     |

Maldonado *et al.* Supplementary Material

|                 |                             |           |           |                          |
|-----------------|-----------------------------|-----------|-----------|--------------------------|
| EX_Tryptophan   | HC00080_s =<br>HC00080_s_xt | -0.006982 | -0.000055 | Tryptophan import        |
| EX_Tyrosine     | HC00085_s =<br>HC00085_s_xt | -0.021401 | -0.002104 | Tyrosine import          |
| EX_Valine       | HC00174_s =<br>HC00174_s_xt | -0.031520 | -0.003558 | Valine import            |
| EX_Choline      | HC00112_s =<br>HC00112_s_xt | -0.004596 | 0.000521  | Choline exchange         |
| EX_Folate       | HC00396_s =<br>HC00396_s_xt | -0.000046 | 0.000198  | Folate exchange          |
| EX_Nicotinamide | HC00149_s =<br>HC00149_s_xt | -0.001838 | 0.000057  | Nicotinamide<br>exchange |
| EX_Pantothenate | HC00568_s =<br>HC00568_s_xt | -0.000075 | 0.000005  | Pantothenate<br>exchange |
| EX_Thiamin      | HC00316_s =<br>HC00316_s_xt | -0.000662 | 0.000497  | Thiamin exchange         |
| EX_Urate        | HC00310_s =<br>HC00310_s_xt | -0.000306 | 0.000212  | Urate export             |
| EX_Glucose      | HC00040_s =<br>HC00040_s_xt | -1.0      | 1.0       | Glucose exchange         |
| EX_Fructose     | HC00097_s =<br>HC00097_s_xt | -1.0      | 1.0       | Fructose exchange        |
| EX_L-Lactate    | HC00177_s =<br>HC00177_s_xt | -1.0      | 1.0       | L-Lactate exchange       |
| EX_Fe2+         | HC01846_s =<br>HC01846_s_xt | -1.0      | 1.0       | Fe2+ exchange            |
| EX_Inositol     | HC00135_s =<br>HC00135_s_xt | -1.0      | 1.0       | Inositol exchange        |
| EX_Pyridoxine   | HC00268_s =<br>HC00268_s_xt | -1.0      | 1.0       | Pyridoxine exchange      |
| EX_Riboflavin   | HC00232_s =<br>HC00232_s_xt | -1.0      | 1.0       | Riboflavin exchange      |
| EX_Cholesterol  | HC00178_b =<br>HC00178_b_xt | 0.0       | 1.0       | Cholesterol export       |
| EX_H2S          | HC00250_s =<br>HC00250_s_xt | 0.0       | 1.0       | H2S export               |
| EX_Sulfate      | HC00062_s =<br>HC00062_s_xt | -1.0      | 1.0       | Sulfate exchange         |
| EX_Urea         | HC00089_s =<br>HC00089_s_xt | 0.0       | 1.0       | Urea export              |

Originally sourced from HepatoNet1 PIPES external metabolite exchange set. Modifications were made to represent serum-free, supplemented DMEM nutrient composition. Constraints were set on the metabolite fluxes as measured by <sup>3</sup>. A negative flux represents import while a positive flux represents export, and are set as the lower and upper bounds, respectively. Metabolite fluxes that were not measured by <sup>3</sup> were set accordingly as described by HepatoNet1 PIPES. <sup>1</sup>Metabolites were not measured in <sup>3</sup> and fluxes were set as the lowest minimum and highest maximum flux values from the amino acid flux values from the CORE dataset. The external metabolites are labelled as \_xt, the sinusoidal space is \_s, and the bile space is \_b.

\*For qualitative PPAR $\alpha$  simulations, all upper and lower bounds were arbitrarily set to range from -1.0 to 1.0 for bidirectional fluxes and 0.0 to 1.0 for unidirectional fluxes.

TABLE S5

Table S5. Generic biomass function used for simulations\*

| Recon2                |                          | HepatoNet1 |                               |               |               |
|-----------------------|--------------------------|------------|-------------------------------|---------------|---------------|
| CONSUME               |                          | ID         | Name                          | Sum formula   | Compartments  |
| 0.505626 M_ala_L_c    | L-alanine                | HC00048    | Alanine                       | C3H7NO2       | c,s,l,m       |
| 0.35926 M_arg_L_c     | L-arginine               | HC00065    | Arginine                      | C6H14N4O2     | c,s,l,m       |
| 0.279425 M_asn_L_c    | L-asparagine             | HC00148    | Asparagine                    | C4H8N2O3      | c,s,l,m       |
| 0.352607 M_asp_L_c    | L-aspartate              | HC00055    | Aspartate                     | C4H7NO4       | c,s,l,m       |
| 0.046571 M_cys_L_c    | L-cysteine               | HC00099    | Cysteine                      | C3H7NO2S      | c,s,l,m       |
| 0.325996 M_gln_L_c    | L-glutamine              | HC00067    | Glutamine                     | C5H10N2O3     | c,s,l,m       |
| 0.385872 M_glu_L_c    | L-glutamate              | HC00034    | Glutamate                     | C5H9NO4       | c,s,l,m       |
| 0.538891 M_gly_c      | glycine                  | HC00045    | Glycine                       | C2H5NO2       | c,s,l,m       |
| 0.126406 M_his_L_c    | L-histidine              | HC00133    | Histidine                     | C6H9N3O2      | c,s,l,m       |
| 0.286078 M_ile_L_c    | L-isoleucine             | HC00334    | Isoleucine                    | C6H13NO2      | c,s,l,m       |
| 0.545544 M_leu_L_c    | L-leucine                | HC00121    | Leucine                       | C6H13NO2      | c,s,l,m       |
| 0.592114 M_lys_L_c    | L-lysine                 | HC00053    | Lysine                        | C6H14N2O2     | c,s,l,m       |
| 0.153018 M_met_L_c    | L-methionine             | HC00075    | Methionine                    | C5H11NO2S     | c,s,l,m       |
| 0.259466 M_phe_L_c    | L-phenylalanine          | HC00081    | Phenylalanine                 | C9H11NO2      | c,s,l,m       |
| 0.412484 M_pro_L_c    | L-proline                | HC00145    | Proline                       | C5H9NO2       | c,s,l,m       |
| 0.392525 M_ser_L_c    | L-serine                 | HC00068    | Serine                        | C3H7NO3       | c,s,l,m       |
| 0.31269 M_thr_L_c     | L-threonine              | HC00179    | Threonine                     | C4H9NO3       | c,s,l,m       |
| 0.013306 M_trp_L_c    | L-tryptophan             | HC00080    | Tryptophan                    | C11H12N2O2    | c,s,l         |
| 0.159671 M_tyr_L_c    | L-tyrosine               | HC00085    | Tyrosine                      | C9H11NO3      | c,s,l,m       |
| 0.352607 M_val_L_c    | L-valine                 | HC00174    | Valine                        | C5H11NO2      | c,s,l,m       |
| 0.011658 M_clpn_hs_c  | cardiolipin              |            | NOT REPRESENTED IN HEPATONET1 |               |               |
| 0.013183 M_datp_n     | dATP                     | HC00129    | dATP                          | C10H16N5O12P3 | c,m           |
| 0.009442 M_dctp_n     | dCTP                     | HC00367    | dCTP                          | C9H16N3O13P3  | c             |
| 0.009898 M_dgtp_n     | dGTP                     | HC00252    | dGTP                          | C10H16N5O13P3 | c,s,m         |
| 0.013091 M_dttp_n     | dTTP                     | HC00368    | dTTP                          | C10H17N2O14P3 | c,s           |
| 0.275194 M_g6p_c      | D-glucose-6-phosphate    | HC00094    | Glucose-6P                    | C6H13O9P      | r,c           |
| 0.036117 M_gtp_c      | GTP                      | HC00051    | GTP                           | C10H16N5O14P3 | c,s,m,n       |
| 0.053446 M_utp_c      | UTP                      | HC00077    | UTP                           | C9H15N2O15P3  | c,s           |
| 0.039036 M_ctp_c      | CTP                      | HC00066    | CTP                           | C9H16N3O14P3  | c,s,m,n       |
| 20.704451 M_atp_c     | ATP                      | HC00012    | ATP                           | C10H16N5O13P3 | r,c,s,l,m,p   |
| 20.650823 M_h2o_c     | H2O                      | HC00011    | H2O                           | H2O           | r,c,s,l,m,n,p |
| 0.023315 M_pail_hs_c  | phosphatidylinositol     | HC02009    | PI-pool                       | C11H17O13PR2  | r,c,l         |
| 0.154463 M_pchol_hs_c | phosphatidylcholine      | HC02080    | Bile-PC-pool                  | C10H19NO8PR2  | b,c           |
| 0.055374 M_pe_hs_c    | phosphatidylethanolamine | HC02079    | PE-PS-VLDL-pool               | C7H12NO8PR2   | c             |
| 0.002914 M_pglyc_hs_c | phosphatidylglycerol     | HC02096    | PG-CL-pool                    | C8H13O10PR2   | m             |
| 0.005829 M_ps_hs_c    | phosphatidylserine       | HC02006    | PS-VLDL-pool                  | C8H12NO10PR2  | r,b,c,l       |

Maldonado *et al.* Supplementary Material

| 0.020401 M_chsterol_c   | cholesterol   | <b>HC00178</b> | Cholesterol | C27H46O            | r,b,c,s,l           |
|-------------------------|---------------|----------------|-------------|--------------------|---------------------|
| 0.017486 M_sphmyln_hs_c | sphingomyelin | <b>HC02007</b> | SM-pool     | C24H49N2O6PR       | r,b,c,l             |
| <b>PRODUCE</b>          |               | <b>ID</b>      | <b>Name</b> | <b>Sum formula</b> | <b>Compartments</b> |
| 20.650823 M_adp_c       | ADP           | <b>HC00018</b> | ADP         | C10H15N5O10P2      | r,c,s,l,m,p         |
| 20.650823 M_h_c         | H+            | <b>HC00083</b> | H+(PG)      | H                  | c,s,m,p             |
| 20.650823 M_pi_c        | phosphate     | <b>HC00019</b> | Pi          | H3PO4              | r,c,s,l,m,p         |

\*generic biomass function adapted from Recon2<sup>28</sup>

$$\begin{aligned}
 R_{\text{biomass\_reaction}} = & 0.505626 M_{\text{ala\_L\_c}} + 0.35926 M_{\text{arg\_L\_c}} + 0.279425 M_{\text{asn\_L\_c}} + 0.352607 M_{\text{asp\_L\_c}} + 20.704451 \\
 & M_{\text{atp\_c}} + 0.020401 M_{\text{chsterol\_c}} + 0.011658 M_{\text{clpn\_hs\_c}} + 0.039036 M_{\text{ctp\_c}} + 0.046571 M_{\text{cys\_L\_c}} + \\
 & 0.013183 M_{\text{datp\_n}} + 0.009442 M_{\text{dctp\_n}} + 0.009898 M_{\text{dgtp\_n}} + 0.013091 M_{\text{dttp\_n}} + 0.275194 \\
 & M_{\text{g6p\_c}} + 0.325996 M_{\text{gln\_L\_c}} + 0.385872 M_{\text{glu\_L\_c}} + 0.538891 M_{\text{gly\_c}} + 0.036117 M_{\text{gtp\_c}} + \\
 & 20.650823 M_{\text{h2o\_c}} + 0.126406 M_{\text{his\_L\_c}} + 0.286078 M_{\text{ile\_L\_c}} + 0.545544 M_{\text{leu\_L\_c}} + 0.592114 \\
 & M_{\text{lys\_L\_c}} + 0.153018 M_{\text{met\_L\_c}} + 0.023315 M_{\text{pail\_hs\_c}} + 0.154463 M_{\text{pchol\_hs\_c}} + 0.055374 \\
 & M_{\text{pe\_hs\_c}} + 0.002914 M_{\text{pglyc\_hs\_c}} + 0.259466 M_{\text{phe\_L\_c}} + 0.412484 M_{\text{pro\_L\_c}} + 0.005829 \\
 & M_{\text{ps\_hs\_c}} + 0.392525 M_{\text{ser\_L\_c}} + 0.017486 M_{\text{sphmyln\_hs\_c}} + 0.31269 M_{\text{thr\_L\_c}} + 0.013306 \\
 & M_{\text{trp\_L\_c}} + 0.159671 M_{\text{tyr\_L\_c}} + 0.053446 M_{\text{utp\_c}} + 0.352607 M_{\text{val\_L\_c}} = 20.650823 M_{\text{adp\_c}} + \\
 & 20.650823 M_{\text{h\_c}} + 20.650823 M_{\text{pi\_c}}
 \end{aligned}$$

**TABLE S6**

**Table S6.** Custom primer sequences used to quantify PPAR $\alpha$  transcript expression via qRT-PCR; primers were synthesised and supplied by Eurofins MWG (Germany).

|                |                                          |
|----------------|------------------------------------------|
| hPPAR $\alpha$ |                                          |
| Forward Primer | 5' – GCA AGA AAT GGG AAA CAT CCA A – 3'  |
| Reverse Primer | 5' – TGG TAT TCC GTA AAG CCA AAG CT – 3' |
| 18S            |                                          |
| Forward Primer | 5' – CGG CTA CCA CAT CCA AGG AA – 3'     |
| Reverse Primer | 5' – GCT GGA ATT ACC GCG GCT – 3'        |



TABLE S7

Table S7 Target genes and mediated hepatic reactions within PPAR $\alpha$  regulome model

| Gene* | ENTREZ ID          | Protein                          | Reaction                                                                                                                                                                                                                                                                                                                                                                                                                                                                                                                                                                                                                                                                                                                                                                                                                                                                                                                                                                   | HepatoNet1 reaction                                                                                                                 | PMID                                                                                 |
|-------|--------------------|----------------------------------|----------------------------------------------------------------------------------------------------------------------------------------------------------------------------------------------------------------------------------------------------------------------------------------------------------------------------------------------------------------------------------------------------------------------------------------------------------------------------------------------------------------------------------------------------------------------------------------------------------------------------------------------------------------------------------------------------------------------------------------------------------------------------------------------------------------------------------------------------------------------------------------------------------------------------------------------------------------------------|-------------------------------------------------------------------------------------------------------------------------------------|--------------------------------------------------------------------------------------|
| ABAT  | <a href="#">18</a> | 4-aminobutyrate aminotransferase | beta-Alanine(m) + AKG(m) <=> Glutamate(m) + 3-Oxopropanoate(m)                                                                                                                                                                                                                                                                                                                                                                                                                                                                                                                                                                                                                                                                                                                                                                                                                                                                                                             | r0217                                                                                                                               | <a href="#">17164430</a>                                                             |
| ABCA1 | <a href="#">19</a> | ABCA1                            | Cholesterol(c) + ATP(c) + H2O(c) --> Cholesterol(s) + ADP(c) + Pi(c)<br>Arachidonate(c) + ATP(c) + H2O(c) --> Arachidonate(s) + ADP(c) + Pi(c)<br>Palmitate(c) + ATP(c) + H2O(c) --> Palmitate(s) + ADP(c) + Pi(c)<br>Oleate(c) + ATP(c) + H2O(c) --> Oleate(s) + ADP(c) + Pi(c)<br>Stearate(c) + ATP(c) + H2O(c) --> Stearate(s) + ADP(c) + Pi(c)<br>Linoleate(c) + ATP(c) + H2O(c) --> Linoleate(s) + ADP(c) + Pi(c)<br>Elaidate(c) + ATP(c) + H2O(c) --> Elaidate(s) + ADP(c) + Pi(c)<br>gamma-Linolenate(c) + ATP(c) + H2O(c) --> gamma-Linolenate(s) + ADP(c) + Pi(c)<br>Linolenate(c) + ATP(c) + H2O(c) --> Linolenate(s) + ADP(c) + Pi(c)<br>Lignocerate(c) + ATP(c) + H2O(c) --> Lignocerate(s) + ADP(c) + Pi(c)<br>Palmitolate(c) + ATP(c) + H2O(c) --> Palmitolate(s) + ADP(c) + Pi(c)<br>PC-VLDL-pool(c) + ATP(c) + H2O(c) --> PC-VLDL-pool(s) + ADP(c) + Pi(c)<br>Dihomo-gamma-linolenate(c) + ATP(c) + H2O(c) --> Dihomo-gamma-linolenate(s) + ADP(c) + Pi(c) | r1513<br>r1514<br>r1515<br>r1516<br>r1517<br>r1518<br>r1519<br>r1520<br>r1521<br>r1522<br>r1523<br>r1524<br>r1525<br>r1526<br>r1527 | <a href="#">19710929</a> ,<br><a href="#">18288265</a> ,<br><a href="#">12512040</a> |

\*PPAR $\alpha$  target gene with no reaction represented within the HepatoNet1 GSMN

Maldonado *et al.* Supplementary Material

|                          |                          |                                                      |                                                                                                                                                                                                                                                                                                                                                                                                                                                                                                                                        |                                                             |                                                                                                                    |
|--------------------------|--------------------------|------------------------------------------------------|----------------------------------------------------------------------------------------------------------------------------------------------------------------------------------------------------------------------------------------------------------------------------------------------------------------------------------------------------------------------------------------------------------------------------------------------------------------------------------------------------------------------------------------|-------------------------------------------------------------|--------------------------------------------------------------------------------------------------------------------|
|                          |                          |                                                      | GM4-pool(c) + ATP(c) + H2O(c) --> GM4-pool(s) + ADP(c) + Pi(c)<br>decanoic-acid(c) + ATP(c) + H2O(c) --> decanoic-acid(s) + ADP(c) + Pi(c)<br>lauric-acid(c) + ATP(c) + H2O(c) --> lauric-acid(s) + ADP(c) + Pi(c)<br>myristic-acid(c) + ATP(c) + H2O(c) --> myristic-acid(s) + ADP(c) + Pi(c)<br>ApoA1(c) <=> ApoA1(s)                                                                                                                                                                                                                | r1528<br>r1529<br>r0808                                     |                                                                                                                    |
| <b>ABCB4</b>             | <a href="#">5244</a>     | MDR3                                                 | Cholesterol(c) + ATP(c) + H2O(c) --> Cholesterol(b) + ADP(c) + Pi(c)<br>PE-VLDL-pool(c) + ATP(c) + H2O(c) --> PE-VLDL-pool(b) + ADP(c) + Pi(c)<br>SM-pool(c) + ATP(c) + H2O(c) --> SM-pool(b) + ADP(c) + Pi(c)<br>Bile-PC-pool(c) + ATP(c) + H2O(c) --> Bile-PC-pool(b) + ADP(c) + Pi(c)                                                                                                                                                                                                                                               | r1508<br>r1509<br>r1510<br>r1511                            | <a href="#">19710929</a> ,<br><a href="#">18288265</a> ,<br><a href="#">12512040</a> ,<br><a href="#">12381268</a> |
| <b>ABCD2</b>             | <a href="#">225</a>      | ATP-binding<br>cassette sub-<br>family D member<br>2 | Arachidonate(c) + ATP(c) + H2O(c) --> Arachidonate(p) + ADP(c) + Pi(c)<br>Palmitate(c) + ATP(c) + H2O(c) --> Palmitate(p) + ADP(c) + Pi(c)<br>Propanoyl-CoA(c) + ATP(c) + H2O(c) --> Propanoyl-CoA(p) + ADP(c) + Pi(c)<br>Palmitoyl-CoA(c) + ATP(c) + H2O(c) --> Palmitoyl-CoA(p) + ADP(c) + Pi(c)<br>Choloyl-CoA(c) + ATP(c) + H2O(c) --> Choloyl-CoA(p) + ADP(c) + Pi(c)<br>Linoleoyl-CoA(c) + ATP(c) + H2O(c) --> Linoleoyl-CoA(p) + ADP(c) + Pi(c)<br>Arachidonyl-CoA(c) + ATP(c) + H2O(c) --> Arachidonyl-CoA(p) + ADP(c) + Pi(c) | r2497<br>r2498<br>r2499<br>r2500<br>r2501<br>r2502<br>r2503 | <a href="#">18288265</a> ,<br><a href="#">11422379</a>                                                             |
| <b>ABCD3</b>             | <a href="#">5825</a>     | ATP-binding<br>cassette sub-<br>family D member<br>3 | half transporter - functional heterodimer with D2                                                                                                                                                                                                                                                                                                                                                                                                                                                                                      | -                                                           | <a href="#">18288265</a> ,<br><a href="#">11422379</a>                                                             |
| <b>ACAA1A/<br/>ACAA2</b> | <a href="#">30/10449</a> | 3-ketoacyl-CoA<br>thiolase                           | Propanoyl-CoA(m) + Acetyl-CoA(m) <=> CoA(m) + 2-Methylacetoacetyl-CoA(m)<br>Acetyl-CoA(m) + Butyryl-CoA(m) <- CoA(m) + 3-Oxohehexanoyl-CoA(m)                                                                                                                                                                                                                                                                                                                                                                                          | r0222<br>r0287<br>r0628                                     | <a href="#">18288265</a> ,<br><a href="#">12946649</a> ,<br><a href="#">12729718</a>                               |

Maldonado *et al.* Supplementary Material

|              |                    |                                                             |                                                                                                                                                                                                                                                                                                                                                                                                                                                                                                                                                                                                                                                                                                                                                                                                                                                                                                                                                                                             |                                                                                                                                   |                                                                                                  |
|--------------|--------------------|-------------------------------------------------------------|---------------------------------------------------------------------------------------------------------------------------------------------------------------------------------------------------------------------------------------------------------------------------------------------------------------------------------------------------------------------------------------------------------------------------------------------------------------------------------------------------------------------------------------------------------------------------------------------------------------------------------------------------------------------------------------------------------------------------------------------------------------------------------------------------------------------------------------------------------------------------------------------------------------------------------------------------------------------------------------------|-----------------------------------------------------------------------------------------------------------------------------------|--------------------------------------------------------------------------------------------------|
|              |                    |                                                             | <p>Propanoyl-CoA(p) + Choloyl-CoA(p) &lt;-- CoA(p) + 3alpha,7alpha,12alpha-Trihydroxy-5beta-24-oxocholestanoyl-CoA(p)</p> <p>Acetyl-CoA(m) + Octanoyl-CoA(m) &lt;=&gt; CoA(m) + 3-Oxodecanoyl-CoA(m)</p> <p>Acetyl-CoA(p) + Octanoyl-CoA(p) &lt;-- CoA(p) + 3-Oxodecanoyl-CoA(p)</p> <p>Lauroyl-CoA(m) + Acetyl-CoA(m) &lt;-- CoA(m) + 3-Oxotetradecanoyl-CoA(m)</p> <p>Lauroyl-CoA(p) + Acetyl-CoA(p) &lt;-- CoA(p) + 3-Oxotetradecanoyl-CoA(p)</p> <p>Myristoyl-CoA(m) + Acetyl-CoA(m) &lt;-- CoA(m) + 3-Oxopalmitoyl-CoA(m)</p> <p>Myristoyl-CoA(p) + Acetyl-CoA(p) &lt;-- CoA(p) + 3-Oxopalmitoyl-CoA(p)</p> <p>Propanoyl-CoA(p) + Chenodeoxycholoyl-CoA(p) &lt;=&gt; CoA(p) + 3alpha,7alpha-Dihydroxy-5beta-cholestanoyl-CoA(p) + H2O(p)</p> <p>Decanoyl-CoA(m) + Acetyl-CoA(m) &lt;=&gt; CoA(m) + 3-Oxododecanoyl-CoA(m)</p> <p>Decanoyl-CoA(p) + Acetyl-CoA(p) &lt;-- CoA(p) + 3-Oxododecanoyl-CoA(p)</p> <p>Hexanoyl-CoA(m) + Acetyl-CoA(m) &lt;-- CoA(m) + 3-Oxoctanoyl-CoA(m)</p> | <p>r0634</p> <p>r0635</p> <p>r0639</p> <p>r0640</p> <p>r0653</p> <p>r0654</p> <p>r0698</p> <p>r0724</p> <p>r0725</p> <p>r0732</p> |                                                                                                  |
| <b>ACACB</b> | <a href="#">32</a> | Acetyl-CoA carboxylase 2                                    | <p>ATP(c) + Acetyl-CoA(c) + HCO3-(c) --&gt; ADP(c) + Pi(c) + Malonyl-CoA(c)</p> <p>ATP(m) + Acetyl-CoA(m) + HCO3-(m) --&gt; ADP(m) + Pi(m) + Malonyl-CoA(m)</p>                                                                                                                                                                                                                                                                                                                                                                                                                                                                                                                                                                                                                                                                                                                                                                                                                             | <p>r0184</p> <p>r0185</p>                                                                                                         | <a href="#">18288265</a>                                                                         |
| <b>ACADM</b> | <a href="#">34</a> | Medium-chain specific acyl-CoA dehydrogenase, mitochondrial | <p>Palmitoyl-CoA(m) + Ubiquinone(m) --&gt; (2E)-Hexadecenoyl-CoA(m) + Ubiquinol(m)</p> <p>Propanoyl-CoA(m) + Ubiquinone(m) --&gt; Ubiquinol(m) + Acrylyl-CoA(m)</p>                                                                                                                                                                                                                                                                                                                                                                                                                                                                                                                                                                                                                                                                                                                                                                                                                         | <p>r0310</p> <p>r0683</p>                                                                                                         | <p><a href="#">10377439</a>,</p> <p><a href="#">18288265</a>,</p> <p><a href="#">9488698</a></p> |
| <b>ACADS</b> | <a href="#">35</a> | Short-chain specific acyl-CoA dehydrogenase, mitochondrial  | <p>Isobutyryl-CoA(m) + Ubiquinone(m) --&gt; Methacrylyl-CoA(m) + Ubiquinol(m)</p>                                                                                                                                                                                                                                                                                                                                                                                                                                                                                                                                                                                                                                                                                                                                                                                                                                                                                                           | <p>r0560</p>                                                                                                                      | <p><a href="#">10359558</a>,</p> <p><a href="#">18288265</a>,</p> <p><a href="#">9488698</a></p> |

Maldonado *et al.* Supplementary Material

|               |                        |                                                                |                                                                                                                                                                                                                                                                                                                                                                                                                                                                                                                                                                                                                                                                                                                                                                          |                                                                               |                                                                                                                                                 |
|---------------|------------------------|----------------------------------------------------------------|--------------------------------------------------------------------------------------------------------------------------------------------------------------------------------------------------------------------------------------------------------------------------------------------------------------------------------------------------------------------------------------------------------------------------------------------------------------------------------------------------------------------------------------------------------------------------------------------------------------------------------------------------------------------------------------------------------------------------------------------------------------------------|-------------------------------------------------------------------------------|-------------------------------------------------------------------------------------------------------------------------------------------------|
| <b>ACADVL</b> | <a href="#">37</a>     | Very long-chain specific acyl-CoA dehydrogenase, mitochondrial | Palmitoyl-CoA(m) + Ubiquinone(m) --> (2E)-Hexadecenoyl-CoA(m) + Ubiquinol(m)<br>Propanoyl-CoA(m) + Ubiquinone(m) --> Ubiquinol(m) + Acrylyl-CoA(m)                                                                                                                                                                                                                                                                                                                                                                                                                                                                                                                                                                                                                       | r0310<br>r0683                                                                | <a href="#">19710929</a> ,<br><a href="#">18288265</a> ,<br><a href="#">17118139</a> ,<br><a href="#">9488698</a>                               |
| <b>ACOT12</b> | <a href="#">134526</a> | Acyl-coenzyme A thioesterase 12                                | Acetyl-CoA(c) + H2O(c) --> CoA(c) + Acetate(c)<br>Acetyl-CoA(m) + H2O(m) --> CoA(m) + Acetate(m)                                                                                                                                                                                                                                                                                                                                                                                                                                                                                                                                                                                                                                                                         | r0061<br>r0062                                                                | <a href="#">18288265</a>                                                                                                                        |
| <b>ACOX1</b>  | <a href="#">51</a>     | Peroxisomal acyl-coenzyme A oxidase 1                          | O2(p) + 3alpha,7alpha,12alpha-Trihydroxy-5beta-cholestanoyl-CoA(p) --> 3alpha,7alpha,12alpha-Trihydroxy-5beta-cholest-24-enoyl-CoA(p) + H2O2(p)<br>Ubiquinone(m) + Butyryl-CoA(m) --> Crotonyl-CoA(m) + Ubiquinol(m)<br>Ubiquinone(m) + Lauroyl-CoA(m) --> (2E)-Dodecenoyl-CoA(m) + Ubiquinol(m)<br>Ubiquinone(m) + Octanoyl-CoA(m) --> (2E)-Octenoyl-CoA(m) + Ubiquinol(m)<br>Ubiquinone(m) + Myristoyl-CoA(m) --> (2E)-Tetradecenoyl-CoA(m) + Ubiquinol(m)<br>Ubiquinone(m) + Hexanoyl-CoA(m) --> (2E)-Hexenoyl-CoA(m) + Ubiquinol(m)<br>Ubiquinone(m) + Decanoyl-CoA(m) --> (2E)-Decenoyl-CoA(m) + Ubiquinol(m)<br>Palmitoyl-CoA(m) + Ubiquinone(m) --> (2E)-Hexadecenoyl-CoA(m) + Ubiquinol(m)<br>Propanoyl-CoA(m) + Ubiquinone(m) --> Ubiquinol(m) + Acrylyl-CoA(m) | r0706<br>r1446<br>r1447<br>r1448<br>r1449<br>r1450<br>r1451<br>r0310<br>r0683 | <a href="#">19710929</a> ,<br><a href="#">10377439</a> ,<br><a href="#">18288265</a>                                                            |
| <b>ACSL1</b>  | <a href="#">2180</a>   | Long chain fatty acid CoA ligase 1                             | Palmitate(r) + ATP(r) + CoA(r) --> Palmitoyl-CoA(r) + AMP(r) + PPI(r)<br>Palmitate(c) + ATP(c) + CoA(c) --> Palmitoyl-CoA(c) + AMP(c) + PPI(c)<br>Palmitolate(r) + ATP(r) + CoA(r) --> (2E)-Hexadecenoyl-CoA(r) + AMP(r) + PPI(r)<br>Palmitolate(c) + ATP(c) + CoA(c) --> (2E)-Hexadecenoyl-CoA(c) + AMP(c) + PPI(c)                                                                                                                                                                                                                                                                                                                                                                                                                                                     | r0311<br>r0312<br>r1251<br>r1252<br>r1253<br>r1254                            | <a href="#">19710929</a> ,<br><a href="#">18288265</a> ,<br><a href="#">11371553</a> ,<br><a href="#">7642600</a> ,<br><a href="#">17118139</a> |

Maldonado *et al.* Supplementary Material

|              |                      |                                    |                                                                                                                                                                                                                                                                                                                                                                                                                                                                                                                                                                                                                                                                                                                                                                                                                                                                                                                                                                                                                                                                                                                                                                                                                                                                                                                                                 |                                                                                                                  |                                                               |
|--------------|----------------------|------------------------------------|-------------------------------------------------------------------------------------------------------------------------------------------------------------------------------------------------------------------------------------------------------------------------------------------------------------------------------------------------------------------------------------------------------------------------------------------------------------------------------------------------------------------------------------------------------------------------------------------------------------------------------------------------------------------------------------------------------------------------------------------------------------------------------------------------------------------------------------------------------------------------------------------------------------------------------------------------------------------------------------------------------------------------------------------------------------------------------------------------------------------------------------------------------------------------------------------------------------------------------------------------------------------------------------------------------------------------------------------------|------------------------------------------------------------------------------------------------------------------|---------------------------------------------------------------|
|              |                      |                                    | <p>Stearate(r) + ATP(r) + CoA(r) --&gt; Stearoyl-CoA(r) + AMP(r) + PPi(r)<br/>                     Stearate(c) + ATP(c) + CoA(c) --&gt; Stearoyl-CoA(c) + AMP(c) + PPi(c)<br/>                     ATP(r) + CoA(r) + Oleate(r) --&gt; Oleoyl-CoA(r) + AMP(r) + PPi(r)<br/>                     ATP(c) + CoA(c) + Oleate(c) --&gt; Oleoyl-CoA(c) + AMP(c) + PPi(c)<br/>                     Linoleate(r) + ATP(r) + CoA(r) --&gt; AMP(r) + PPi(r) + Linoleoyl-CoA(r)<br/>                     Linoleate(c) + ATP(c) + CoA(c) --&gt; AMP(c) + PPi(c) + Linoleoyl-CoA(c)<br/>                     ATP(r) + CoA(r) + Linolenate(r) --&gt; Linolenoyl-CoA(r) + AMP(r) + PPi(r)<br/>                     gamma-Linolenate(r) + ATP(r) + CoA(r) --&gt; gamma-Linolenoyl-CoA(r) + AMP(r) + PPi(r)<br/>                     gamma-Linolenate(c) + ATP(c) + CoA(c) --&gt; gamma-Linolenoyl-CoA(c) + AMP(c) + PPi(c)<br/>                     Arachidonate(r) + ATP(r) + CoA(r) --&gt; Arachidonyl-CoA(r) + AMP(r) + PPi(r)<br/>                     Arachidonate(c) + ATP(c) + CoA(c) --&gt; Arachidonyl-CoA(c) + AMP(c) + PPi(c)<br/>                     ATP(r) + CoA(r) + Palmitolate(r) &lt;=&gt; AMP(r) + palmitoleoyl-CoA(r) + PPi(r)<br/>                     ATP(c) + CoA(c) + Palmitolate(c) &lt;=&gt; AMP(c) + palmitoleoyl-CoA(c) + PPi(c)</p> | <p>r1255<br/>r1256<br/>r1257<br/>r1258<br/>r1259<br/>r1260<br/>r1261<br/>r1262<br/>r1263<br/>r1487<br/>r1488</p> |                                                               |
| <b>ACSL3</b> | <a href="#">2181</a> | Long chain fatty acid CoA ligase 3 | <p>Palmitate(r) + ATP(r) + CoA(r) --&gt; Palmitoyl-CoA(r) + AMP(r) + PPi(r)<br/>                     Palmitate(c) + ATP(c) + CoA(c) --&gt; Palmitoyl-CoA(c) + AMP(c) + PPi(c)<br/>                     Palmitolate(r) + ATP(r) + CoA(r) --&gt; (2E)-Hexadecenoyl-CoA(r) + AMP(r) + PPi(r)<br/>                     Palmitolate(c) + ATP(c) + CoA(c) --&gt; (2E)-Hexadecenoyl-CoA(c) + AMP(c) + PPi(c)<br/>                     Stearate(r) + ATP(r) + CoA(r) --&gt; Stearoyl-CoA(r) + AMP(r) + PPi(r)<br/>                     Stearate(c) + ATP(c) + CoA(c) --&gt; Stearoyl-CoA(c) + AMP(c) + PPi(c)<br/>                     ATP(r) + CoA(r) + Oleate(r) --&gt; Oleoyl-CoA(r) + AMP(r) + PPi(r)</p>                                                                                                                                                                                                                                                                                                                                                                                                                                                                                                                                                                                                                                           | <p>r0311<br/>r0312<br/>r1251<br/>r1252<br/>r1253<br/>r1254<br/>r1255<br/>r1256<br/>r1257</p>                     | <p><a href="#">19710929</a>,<br/><a href="#">18288265</a></p> |

Maldonado *et al.* Supplementary Material

|              |                       |                                    |                                                                                                                                                                                                                                                                                                                                                                                                                                                                                                                                                                                                                                                                                                                                                                                                                                                                                   |                                                                                                                                                             |                                                                                                   |
|--------------|-----------------------|------------------------------------|-----------------------------------------------------------------------------------------------------------------------------------------------------------------------------------------------------------------------------------------------------------------------------------------------------------------------------------------------------------------------------------------------------------------------------------------------------------------------------------------------------------------------------------------------------------------------------------------------------------------------------------------------------------------------------------------------------------------------------------------------------------------------------------------------------------------------------------------------------------------------------------|-------------------------------------------------------------------------------------------------------------------------------------------------------------|---------------------------------------------------------------------------------------------------|
|              |                       |                                    | <p>ATP(c) + CoA(c) + Oleate(c) --&gt; Oleoyl-CoA(c) + AMP(c) + PPi(c)</p> <p>Linoleate(r) + ATP(r) + CoA(r) --&gt; AMP(r) + PPi(r) + Linoleoyl-CoA(r)</p> <p>Linoleate(c) + ATP(c) + CoA(c) --&gt; AMP(c) + PPi(c) + Linoleoyl-CoA(c)</p> <p>ATP(r) + CoA(r) + Linolenate(r) --&gt; Linolenoyl-CoA(r) + AMP(r) + PPi(r)</p> <p>gamma-Linolenate(r) + ATP(r) + CoA(r) --&gt; gamma-Linolenoyl-CoA(r) + AMP(r) + PPi(r)</p> <p>gamma-Linolenate(c) + ATP(c) + CoA(c) --&gt; gamma-Linolenoyl-CoA(c) + AMP(c) + PPi(c)</p> <p>Arachidonate(r) + ATP(r) + CoA(r) --&gt; Arachidonyl-CoA(r) + AMP(r) + PPi(r)</p> <p>Arachidonate(c) + ATP(c) + CoA(c) --&gt; Arachidonyl-CoA(c) + AMP(c) + PPi(c)</p> <p>ATP(r) + CoA(r) + Palmitolate(r) &lt;=&gt; AMP(r) + palmitoleoyl-CoA(r) + PPi(r)</p> <p>ATP(c) + CoA(c) + Palmitolate(c) &lt;=&gt; AMP(c) + palmitoleoyl-CoA(c) + PPi(c)</p> | <p>r1258</p> <p>r1259</p> <p>r1260</p> <p>r1261</p> <p>r1262</p> <p>r1263</p> <p>r1487</p> <p>r1488</p>                                                     |                                                                                                   |
| <b>ACSL5</b> | <a href="#">51703</a> | Long chain fatty acid CoA ligase 5 | <p>Palmitate(r) + ATP(r) + CoA(r) --&gt; Palmitoyl-CoA(r) + AMP(r) + PPi(r)</p> <p>Palmitate(c) + ATP(c) + CoA(c) --&gt; Palmitoyl-CoA(c) + AMP(c) + PPi(c)</p> <p>Palmitolate(r) + ATP(r) + CoA(r) --&gt; (2E)-Hexadecenoyl-CoA(r) + AMP(r) + PPi(r)</p> <p>Palmitolate(c) + ATP(c) + CoA(c) --&gt; (2E)-Hexadecenoyl-CoA(c) + AMP(c) + PPi(c)</p> <p>Stearate(r) + ATP(r) + CoA(r) --&gt; Stearoyl-CoA(r) + AMP(r) + PPi(r)</p> <p>Stearate(c) + ATP(c) + CoA(c) --&gt; Stearoyl-CoA(c) + AMP(c) + PPi(c)</p> <p>ATP(r) + CoA(r) + Oleate(r) --&gt; Oleoyl-CoA(r) + AMP(r) + PPi(r)</p> <p>ATP(c) + CoA(c) + Oleate(c) --&gt; Oleoyl-CoA(c) + AMP(c) + PPi(c)</p> <p>Linoleate(r) + ATP(r) + CoA(r) --&gt; AMP(r) + PPi(r) + Linoleoyl-CoA(r)</p> <p>Linoleate(c) + ATP(c) + CoA(c) --&gt; AMP(c) + PPi(c) + Linoleoyl-CoA(c)</p>                                               | <p>r0311</p> <p>r0312</p> <p>r1251</p> <p>r1252</p> <p>r1253</p> <p>r1254</p> <p>r1255</p> <p>r1256</p> <p>r1257</p> <p>r1258</p> <p>r1259</p> <p>r1260</p> | <p><a href="#">19710929</a>,</p> <p><a href="#">18288265</a>,</p> <p><a href="#">17118139</a></p> |

Maldonado *et al.* Supplementary Material

|               |                       |                                                     |                                                                                                                                                                                                                                                                                                                                                                                                                                                                                                                                                                                                                                                                                                               |                                                                                                         |                          |
|---------------|-----------------------|-----------------------------------------------------|---------------------------------------------------------------------------------------------------------------------------------------------------------------------------------------------------------------------------------------------------------------------------------------------------------------------------------------------------------------------------------------------------------------------------------------------------------------------------------------------------------------------------------------------------------------------------------------------------------------------------------------------------------------------------------------------------------------|---------------------------------------------------------------------------------------------------------|--------------------------|
|               |                       |                                                     | <p>ATP(r) + CoA(r) + Linolenate(r) --&gt; Linolenoyl-CoA(r) + AMP(r) + PPi(r)</p> <p>gamma-Linolenate(r) + ATP(r) + CoA(r) --&gt; gamma-Linolenoyl-CoA(r) + AMP(r) + PPi(r)</p> <p>gamma-Linolenate(c) + ATP(c) + CoA(c) --&gt; gamma-Linolenoyl-CoA(c) + AMP(c) + PPi(c)</p> <p>Arachidonate(r) + ATP(r) + CoA(r) --&gt; Arachidonyl-CoA(r) + AMP(r) + PPi(r)</p> <p>Arachidonate(c) + ATP(c) + CoA(c) --&gt; Arachidonyl-CoA(c) + AMP(c) + PPi(c)</p> <p>ATP(r) + CoA(r) + Palmitolate(r) &lt;=&gt; AMP(r) + palmitoleoyl-CoA(r) + PPi(r)</p> <p>ATP(c) + CoA(c) + Palmitolate(c) &lt;=&gt; AMP(c) + palmitoleoyl-CoA(c) + PPi(c)</p>                                                                       | <p>r1261</p> <p>r1262</p> <p>r1263</p> <p>r1487</p> <p>r1488</p>                                        |                          |
| <b>ACSM3*</b> | <a href="#">6296</a>  | Acyl-coenzyme A synthetase, mitochondrial           | -                                                                                                                                                                                                                                                                                                                                                                                                                                                                                                                                                                                                                                                                                                             | -                                                                                                       | <a href="#">24269660</a> |
| <b>AGPAT2</b> | <a href="#">10555</a> | 1-acyl-sn-glycerol-3-phosphate acyltransferase beta | <p>Phosphatidate-VLDL-TG-pool(c) + CoA(c) &lt;-- Acyl-CoA-VLDL-TG2-pool(c) + 1-Acylglycerol-3P-VLDL-TG1-pool(c)</p> <p>Phosphatidate-VLDL-PC-pool(c) + CoA(c) &lt;-- Acyl-CoA-VLDL-PC-pool(c) + 1-Acylglycerol-3P-VLDL-PC-pool(c)</p> <p>Phosphatidate-VLDL-PE-pool(c) + CoA(c) &lt;-- Acyl-CoA-VLDL-PE-pool(c) + 1-Acylglycerol-3P-VLDL-PE-pool(c)</p> <p>Phosphatidate-VLDL-PS-pool(c) + CoA(c) &lt;-- Acyl-CoA-VLDL-PS-pool(c) + 1-Acylglycerol-3P-VLDL-PS-pool(c)</p> <p>Phosphatidate-VLDL-PI-pool(c) + CoA(c) &lt;-- 1-Acylglycerol-3P-VLDL-PI-pool(c) + Acyl-CoA-VLDL-PI-pool(c)</p> <p>CoA(c) + Phosphatidate-VLDL-SM-pool(c) &lt;-- Acyl-CoA-VLDL-SM-pool(c) + 1-Acylglycerol-3P-VLDL-SM-pool(c)</p> | <p>r1211</p> <p>r1212</p> <p>r1213</p> <p>r1214</p> <p>r1215</p> <p>r1216</p> <p>r1286</p> <p>r1308</p> | <a href="#">18288265</a> |

Maldonado *et al.* Supplementary Material

|                |                       |                                                        |                                                                                                                                                                                                                                                                                    |                                                    |                          |
|----------------|-----------------------|--------------------------------------------------------|------------------------------------------------------------------------------------------------------------------------------------------------------------------------------------------------------------------------------------------------------------------------------------|----------------------------------------------------|--------------------------|
|                |                       |                                                        | Phosphatidate-Bile-PC-pool(c) + CoA(c) <-- Acyl-CoA-Bile-PC-pool(c) + 1-Acylglycerol-3P-Bile-PC-pool(c)<br>Phosphatidate-CL-pool(m) + CoA(m) <-- Acyl-CoA-CL-pool(m) + 1-Acylglycerol-3P-CL-pool(m)                                                                                |                                                    |                          |
| <b>AGXT2</b>   | <a href="#">64902</a> | Alanine-glyoxylate aminotransferase 2, mitochondrial   | D-3-Amino-isobutanoate(m) + Pyruvate(m) <=> 2-Methyl-3-oxopropanoate(m) + Alanine(m)                                                                                                                                                                                               | r0484                                              | <a href="#">24269660</a> |
| <b>AKR1B10</b> | <a href="#">57016</a> | Aldo-keto reductase family member B10                  | Glycerol(c) + NADP+(c) <=> Glyceraldehyde(c) + NADPH(c)<br>Glycerol(m) + NADP+(m) --> Glyceraldehyde(m) + NADPH(m)                                                                                                                                                                 | r0245<br>r0246                                     | <a href="#">19710929</a> |
| <b>AKR1C3*</b> | <a href="#">8644</a>  | Aldo-keto reductase family member c3                   | -                                                                                                                                                                                                                                                                                  | -                                                  | <a href="#">24269660</a> |
| <b>ALAS1</b>   | <a href="#">211</a>   | 5-aminolevulinate synthase, nonspecific, mitochondrial | Glycine(m) + Succinyl-CoA(m) <=> CoA(m) + CO2(m) + 5-Aminolevulinate(m)<br>Glycine(m) + Succinyl-CoA(m) <=> CoA(m) + 2-Amino-3-oxoadipate(m)<br>2-Amino-3-oxoadipate(m) <=> CO2(m) + 5-Aminolevulinate(m)                                                                          | r0195<br>r0196<br>r0517                            | <a href="#">24269660</a> |
| <b>ALDH3A1</b> | <a href="#">218</a>   | Aldehyde dehydrogenase, dimeric NADP-preferring        | Acetaldehyde(c) + NAD+(c) + H2O(c) --> Acetate(c) + NADH(c)<br>Acetaldehyde(c) + H2O(c) + NADP+(c) --> Acetate(c) + NADPH(c)<br>NAD+(c) + H2O(c) + Phenylacetaldehyde(c) <=> NADH(c) + Phenylacetate(c)<br>NAD+(m) + H2O(m) + Phenylacetaldehyde(m) <=> NADH(m) + Phenylacetate(m) | r0176<br>r0177<br>r0545<br>r0546<br>r0547<br>r0548 | <a href="#">19710929</a> |



Maldonado *et al.* Supplementary Material

|                                      |                            |                                     |                                                                                                                                                                                                                                                                                                                                                                                                                                                                                                                                                                                                                                                                                                                                                                                                                                                                                                                                       |                                                                                                         |                                                                                                   |
|--------------------------------------|----------------------------|-------------------------------------|---------------------------------------------------------------------------------------------------------------------------------------------------------------------------------------------------------------------------------------------------------------------------------------------------------------------------------------------------------------------------------------------------------------------------------------------------------------------------------------------------------------------------------------------------------------------------------------------------------------------------------------------------------------------------------------------------------------------------------------------------------------------------------------------------------------------------------------------------------------------------------------------------------------------------------------|---------------------------------------------------------------------------------------------------------|---------------------------------------------------------------------------------------------------|
|                                      |                            |                                     | <p>H<sub>2</sub>O(c) + Phenylacetaldehyde(c) + NADP+(c) &lt;=&gt; NADPH(c) + Phenylacetate(c)</p> <p>H<sub>2</sub>O(m) + Phenylacetaldehyde(m) + NADP+(m) &lt;=&gt; NADPH(m) + Phenylacetate(m)</p> <p>3,4-Dihydroxymandelaldehyde(m) + NAD+(m) + H<sub>2</sub>O(m) &lt;=&gt; 3,4-Dihydroxymandelate(m) + NADH(m)</p> <p>3,4-Dihydroxymandelaldehyde(m) + H<sub>2</sub>O(m) + NADP+(m) &lt;=&gt; 3,4-Dihydroxymandelate(m) + NADPH(m)</p> <p>3-Methoxy-4-hydroxyphenylacetaldehyde(m) + NAD+(m) + H<sub>2</sub>O(m) &lt;=&gt; NADH(m) + Homovanillate(m)</p> <p>3-Methoxy-4-hydroxyphenylacetaldehyde(m) + H<sub>2</sub>O(m) + NADP+(m) &lt;=&gt; NADPH(m) + Homovanillate(m)</p> <p>3-Methoxy-4-hydroxyphenylglycolaldehyde(m) + NAD+(m) + H<sub>2</sub>O(m) &lt;=&gt; NADH(m) + Vanillylmandelate(m)</p> <p>3-Methoxy-4-hydroxyphenylglycolaldehyde(m) + H<sub>2</sub>O(m) + NADP+(m) &lt;=&gt; NADPH(m) + Vanillylmandelate(m)</p> | <p>r0752</p> <p>r0753</p> <p>r0754</p> <p>r0755</p> <p>r0756</p> <p>r0757</p>                           |                                                                                                   |
| <p><b>ALDH3A</b></p> <p><b>2</b></p> | <p><a href="#">224</a></p> | <p>Fatty aldehyde dehydrogenase</p> | <p>Acetaldehyde(c) + NAD+(c) + H<sub>2</sub>O(c) --&gt; Acetate(c) + NADH(c)</p> <p>Glyceraldehyde(c) + NAD+(c) + H<sub>2</sub>O(c) &lt;=&gt; Glycerate(c) + NADH(c)</p> <p>Glyceraldehyde(m) + NAD+(m) + H<sub>2</sub>O(m) --&gt; Glycerate(m) + NADH(m)</p> <p>H<sub>2</sub>O(m) + 4-Aminobutanal(m) + NADP+(m) &lt;=&gt; 4-Aminobutyrate(m) + NADPH(m)</p> <p>NAD+(m) + H<sub>2</sub>O(m) + 4-Aminobutanal(m) &lt;=&gt; 4-Aminobutyrate(m) + NADH(m)</p>                                                                                                                                                                                                                                                                                                                                                                                                                                                                           | <p>r0176</p> <p>r0392</p> <p>r0393</p> <p>r0464</p> <p>r0549</p> <p>r0642</p> <p>r0643</p> <p>r0688</p> | <p><a href="#">19710929</a>,</p> <p><a href="#">18288265</a>,</p> <p><a href="#">20032461</a></p> |

Maldonado *et al.* Supplementary Material

|                                   |                            |                |                                                                                                                                                                                                                                                                                                                                                                                                                                                                                                                                                                                                                                                                                                                                                                                                                                                  |                                                                                                                      |                                 |
|-----------------------------------|----------------------------|----------------|--------------------------------------------------------------------------------------------------------------------------------------------------------------------------------------------------------------------------------------------------------------------------------------------------------------------------------------------------------------------------------------------------------------------------------------------------------------------------------------------------------------------------------------------------------------------------------------------------------------------------------------------------------------------------------------------------------------------------------------------------------------------------------------------------------------------------------------------------|----------------------------------------------------------------------------------------------------------------------|---------------------------------|
|                                   |                            |                | <p>2-Methyl-3-oxopropanoate(c) + NAD+(c) + H2O(c) &lt;=&gt; Methylmalonate(c) + NADH(c)</p> <p>2-Methyl-3-oxopropanoate(m) + NAD+(m) + H2O(m) &lt;=&gt; Methylmalonate(m) + NADH(m)</p> <p>3alpha,7alpha-Dihydroxy-5beta-cholestan-26-al(c) + NAD+(c) + H2O(c) &lt;=&gt; NADH(c) + 3alpha,7alpha-Dihydroxy-5beta-cholestanate(c)</p> <p>5-Hydroxyindoleacetaldehyde(c) + NAD+(c) + H2O(c) &lt;=&gt; NADH(c) + 5-Hydroxyindoleacetate(c)</p>                                                                                                                                                                                                                                                                                                                                                                                                      | r0758                                                                                                                |                                 |
| <p><b>ALDH9A</b><br/><b>1</b></p> | <p><a href="#">223</a></p> | <p>TMABADH</p> | <p>Acetaldehyde(c) + NAD+(c) + H2O(c) --&gt; Acetate(c) + NADH(c)</p> <p>Glyceraldehyde(c) + NAD+(c) + H2O(c) &lt;=&gt; Glycerate(c) + NADH(c)</p> <p>Glyceraldehyde(m) + NAD+(m) + H2O(m) --&gt; Glycerate(m) + NADH(m)</p> <p>H2O(m) + 4-Aminobutanal(m) + NADP+(m) &lt;=&gt; 4-Aminobutyrate(m) + NADPH(m)</p> <p>NAD+(m) + H2O(m) + 4-Aminobutanal(m) &lt;=&gt; 4-Aminobutyrate(m) + NADH(m)</p> <p>2-Methyl-3-oxopropanoate(c) + NAD+(c) + H2O(c) &lt;=&gt; Methylmalonate(c) + NADH(c)</p> <p>2-Methyl-3-oxopropanoate(m) + NAD+(m) + H2O(m) &lt;=&gt; Methylmalonate(m) + NADH(m)</p> <p>3alpha,7alpha-Dihydroxy-5beta-cholestan-26-al(c) + NAD+(c) + H2O(c) &lt;=&gt; NADH(c) + 3alpha,7alpha-Dihydroxy-5beta-cholestanate(c)</p> <p>5-Hydroxyindoleacetaldehyde(c) + NAD+(c) + H2O(c) &lt;=&gt; NADH(c) + 5-Hydroxyindoleacetate(c)</p> | <p>r0176</p> <p>r0392</p> <p>r0393</p> <p>r0464</p> <p>r0549</p> <p>r0642</p> <p>r0643</p> <p>r0688</p> <p>r0758</p> | <p><a href="#">19710929</a></p> |

Maldonado *et al.* Supplementary Material

|                 |                        |                                |                                                                                                                                                                                                                                                                                                                                                                                                             |       |                                                                                      |
|-----------------|------------------------|--------------------------------|-------------------------------------------------------------------------------------------------------------------------------------------------------------------------------------------------------------------------------------------------------------------------------------------------------------------------------------------------------------------------------------------------------------|-------|--------------------------------------------------------------------------------------|
| <b>ANGPTL4*</b> | <a href="#">51129</a>  | Angiopoietin-related protein 4 | -                                                                                                                                                                                                                                                                                                                                                                                                           | -     | <a href="#">19710929</a> ,<br><a href="#">18288265</a> ,<br><a href="#">15190076</a> |
| <b>APOA1</b>    | <a href="#">335</a>    | Apolipoprotein A-I             | 23 Alanine(c) + 17 Arginine(c) + 19 Glutamine(c) + 30 Glutamate(c) + 11 Glycine(c) + 6 Histidine(c) + 41 Leucine(c) + 4 Methionine(c) + 8 Phenylalanine(c) + 10 Proline(c) + 16 Serine(c) + 12 Threonine(c) + 5 Tryptophan(c) + 7 Tyrosine(c) + 15 Valine(c) + 1068 ATP(c) + 1068 H2O(c) + 5 Asparagine(c) + 16 Aspartate(c) + 22 Lysine(c) --> ApoA1(c) + 267 AMP(c) + 267 PPI(c) + 801 ADP(c) + 801 Pi(c) | r1113 | <a href="#">8647932</a> ,<br><a href="#">9748239</a> ,<br><a href="#">7983038</a>    |
| <b>APOA2*</b>   | <a href="#">336</a>    | Apolipoprotein A-II            | -                                                                                                                                                                                                                                                                                                                                                                                                           | -     | <a href="#">19710929</a> ,<br><a href="#">7635967</a>                                |
| <b>APOA5*</b>   | <a href="#">116519</a> | Apolipoprotein A-V             | -                                                                                                                                                                                                                                                                                                                                                                                                           | -     | <a href="#">19710929</a> ,<br><a href="#">12709436</a> ,<br><a href="#">12637506</a> |
| <b>APOCIII</b>  | <a href="#">345</a>    | Apolipoprotein C-III           | 15 Alanine(c) + 4 Arginine(c) + 3 Glycine(c) + Histidine(c) + 11 Leucine(c) + 3 Methionine(c) + 4 Phenylalanine(c) + 3 Proline(c) + 12 Serine(c) + 5 Threonine(c) + 3 Tryptophan(c) + 2 Tyrosine(c) + 9 Valine(c) + 6 Glutamine(c) + 5 Glutamate(c) + 396 ATP(c) + 396 H2O(c) + 7 Aspartate(c) + 6 Lysine(c) --> ApoC3(c) + 99 AMP(c) + 99 PPI(c) + 297 ADP(c) + 297 Pi(c)                                  | r1100 | <a href="#">7768950</a> ,<br><a href="#">7860752</a> ,<br><a href="#">8847480</a>    |
| <b>AQP3</b>     | <a href="#">360</a>    | Aquaporin-3                    | H2O(s) <=> H2O(c)                                                                                                                                                                                                                                                                                                                                                                                           | r0849 | <a href="#">18288265</a> ,<br><a href="#">15232616</a>                               |
| <b>ASL</b>      | <a href="#">435</a>    | Argininosuccinate lyase        | Argininosuccinate(c) <=> Fumarate(c) + Arginine(c)                                                                                                                                                                                                                                                                                                                                                          | r0261 | <a href="#">17164430</a> ,<br><a href="#">20847941</a>                               |

Maldonado *et al.* Supplementary Material

|                   |                           |                                                       |                                                                                                                                                                                                                                                                                                                                                                                                                                                                                                                                                                                                                                                                                                                                                                                                                                                                                                                                                                                                                                                                                                                                                                                                                                                                                                  |                                                                                                                                                       |                                                                                                                                                                                                                                         |
|-------------------|---------------------------|-------------------------------------------------------|--------------------------------------------------------------------------------------------------------------------------------------------------------------------------------------------------------------------------------------------------------------------------------------------------------------------------------------------------------------------------------------------------------------------------------------------------------------------------------------------------------------------------------------------------------------------------------------------------------------------------------------------------------------------------------------------------------------------------------------------------------------------------------------------------------------------------------------------------------------------------------------------------------------------------------------------------------------------------------------------------------------------------------------------------------------------------------------------------------------------------------------------------------------------------------------------------------------------------------------------------------------------------------------------------|-------------------------------------------------------------------------------------------------------------------------------------------------------|-----------------------------------------------------------------------------------------------------------------------------------------------------------------------------------------------------------------------------------------|
| <b>CBS</b>        | <a href="#">875</a>       | Cystathionine beta-synthase                           | Serine(c) + H <sub>2</sub> S(c) --> Cysteine(c) + H <sub>2</sub> O(c)<br>Serine(c) + Homocysteine(c) <=> H <sub>2</sub> O(c) + L-Cystathionine(c)                                                                                                                                                                                                                                                                                                                                                                                                                                                                                                                                                                                                                                                                                                                                                                                                                                                                                                                                                                                                                                                                                                                                                | r0210<br>r0314                                                                                                                                        | <a href="#">17164430</a>                                                                                                                                                                                                                |
| <b>CPS-1</b>      | <a href="#">1373</a>      | Carbamoyl-phosphate synthase (ammonia), mitochondrial | 2 ATP(m) + CO <sub>2</sub> (m) + H <sub>2</sub> O(m) + NH <sub>3</sub> (m) <=> 2 ADP(m) + Pi(m) + Carbamoyl-P(m)                                                                                                                                                                                                                                                                                                                                                                                                                                                                                                                                                                                                                                                                                                                                                                                                                                                                                                                                                                                                                                                                                                                                                                                 | r0034                                                                                                                                                 | <a href="#">24269660</a>                                                                                                                                                                                                                |
| <b>CPT1A/CPT2</b> | <a href="#">1374/1376</a> | CPT                                                   | Malonyl-CoA(r) + L-Carnitine(r) <=> CoA(r) + Malonyl-Carnitin(r)<br>Malonyl-CoA(c) + L-Carnitine(c) <=> CoA(c) + Malonyl-Carnitin(c)<br>Malonyl-CoA(m) + L-Carnitine(m) <=> CoA(m) + Malonyl-Carnitin(m)<br>Malonyl-CoA(p) + L-Carnitine(p) <-- CoA(p) + Malonyl-Carnitin(p)<br>Palmitoyl-CoA(r) + L-Carnitine(r) <=> CoA(r) + L-Palmitoylcarnitine(r)<br>Palmitoyl-CoA(c) + L-Carnitine(c) <=> CoA(c) + L-Palmitoylcarnitine(c)<br>Palmitoyl-CoA(m) + L-Carnitine(m) <-- CoA(m) + L-Palmitoylcarnitine(m)<br>Palmitoyl-CoA(p) + L-Carnitine(p) <=> CoA(p) + L-Palmitoylcarnitine(p)<br>Linoleoyl-CoA(r) + L-Carnitine(r) <=> CoA(r) + linoleic-Carnitine(r)<br>Linoleoyl-CoA(c) + L-Carnitine(c) <=> CoA(c) + linoleic-Carnitine(c)<br>Linoleoyl-CoA(p) + L-Carnitine(p) --> CoA(p) + linoleic-Carnitine(p)<br>Arachidonyl-CoA(r) + L-Carnitine(r) <=> CoA(r) + Arachidonyl-Carnitine(r)<br>Arachidonyl-CoA(c) + L-Carnitine(c) <=> CoA(c) + Arachidonyl-Carnitine(c)<br>Arachidonyl-CoA(p) + L-Carnitine(p) --> CoA(p) + Arachidonyl-Carnitine(p)<br>palmitoleoyl-CoA(r) + L-Carnitine(r) <=> CoA(r) + palmitoleoyl-Carnitine(r)<br>palmitoleoyl-CoA(c) + L-Carnitine(c) <=> CoA(c) + palmitoleoyl-Carnitine(c)<br>palmitoleoyl-CoA(m) + L-Carnitine(m) <=> CoA(m) + palmitoleoyl-Carnitine(m) | r0430<br>r0431<br>r0432<br>r0433<br>r0434<br>r0435<br>r0436<br>r0437<br>r0438<br>r0439<br>r0440<br>r0441<br>r0442<br>r0443<br>r0444<br>r0445<br>r0446 | <a href="#">19710929</a> ,<br><a href="#">10359558</a> ,<br><a href="#">10377439</a> ,<br><a href="#">18288265</a> ,<br><a href="#">9726988</a> ,<br><a href="#">9535828</a> ,<br><a href="#">9488698</a> ,<br><a href="#">12408750</a> |

Maldonado *et al.* Supplementary Material

|                |                      |                                             |                                                                                                                                                                                                                                                                                                    |                                        |                                                                                      |
|----------------|----------------------|---------------------------------------------|----------------------------------------------------------------------------------------------------------------------------------------------------------------------------------------------------------------------------------------------------------------------------------------------------|----------------------------------------|--------------------------------------------------------------------------------------|
|                |                      |                                             | <p>Oleoyl-CoA(c) + L-Carnitine(c) --&gt; CoA(c) + L-Oleoylcarnitine(c)</p> <p>Propanoyl-CoA(c) + L-Carnitine(c) --&gt; CoA(c) + O-Propanoylcarnitine(c)</p> <p>Butyryl-CoA(c) + L-Carnitine(c) --&gt; CoA(c) + O-Butanoylcarnitine(c)</p>                                                          | <p>r1394</p> <p>r1396</p> <p>r1398</p> |                                                                                      |
| <b>CYP1A2*</b> | <a href="#">1544</a> | Cytochrome P450<br>1A2                      | -                                                                                                                                                                                                                                                                                                  | -                                      | <a href="#">24269660</a>                                                             |
| <b>CYP3A5*</b> | <a href="#">1577</a> | Cytochrome P450<br>3A5                      | -                                                                                                                                                                                                                                                                                                  | -                                      | <a href="#">24269660</a>                                                             |
| <b>CYP3A7*</b> | <a href="#">1551</a> | Cytochrome P450<br>3A7                      | -                                                                                                                                                                                                                                                                                                  | -                                      | <a href="#">24269660</a>                                                             |
| <b>CYP7A1</b>  | <a href="#">1581</a> | Cholesterol 7<br>alpha<br>monooxygenase     | Cholesterol(r) + O2(r) + NADPH(r) <=> 7alpha-Hydroxycholesterol(r) + H2O(r) + NADP+(r)                                                                                                                                                                                                             | r0335                                  | <a href="#">11701475</a> ,<br><a href="#">11042130</a> ,<br><a href="#">10777541</a> |
| <b>CYP27A1</b> | <a href="#">1593</a> | Sterol 27-<br>hydroxylase,<br>mitochondrial | <p>5beta-Cholestane-3alpha,7alpha-diol(m) + NADPH(m) + O2(m) &lt;=&gt; 5beta-Cholestane-3alpha,7alpha,26-triol(m) + H2O(m) + NADP+(m)</p> <p>3alpha,7alpha,12alpha-Trihydroxycoprostan(e) + NADPH(c) + O2(c) &lt;=&gt; 5beta-Cholestane-3alpha,7alpha,12alpha,26-tetrol(c) + H2O(c) + NADP+(c)</p> | <p>r0740</p> <p>r0741</p> <p>r0742</p> | <a href="#">11701475</a> ,<br><a href="#">24269660</a>                               |

Maldonado *et al.* Supplementary Material

|                |                       |                                                                        |                                                                                                                                              |       |                                                                                      |
|----------------|-----------------------|------------------------------------------------------------------------|----------------------------------------------------------------------------------------------------------------------------------------------|-------|--------------------------------------------------------------------------------------|
|                |                       |                                                                        | 3alpha,7alpha,12alpha-Trihydroxycoprostone(m) + NADPH(m) + O2(m) <=> 5beta-Cholestane-3alpha,7alpha,12alpha,26-tetrol(m) + H2O(m) + NADP+(m) |       |                                                                                      |
| <b>CYP2B6*</b> | <a href="#">1555</a>  | Cytochrome P450<br>2B6                                                 | -                                                                                                                                            | -     | <a href="#">24269660</a>                                                             |
| <b>CYP8B1</b>  | <a href="#">1582</a>  | 7-alpha-<br>hydroxycholest-4-<br>en-3-one 12-<br>alpha-<br>hydroxylase | 7alpha-Hydroxycholest-4-en-3-one(r) + O2(r) + NADPH(r) --> 7alpha,12alpha-Dihydroxycholest-4-en-3-one(r) + H2O(r) + NADP+(r)                 | r0751 | <a href="#">10867000</a> ,<br><a href="#">24269660</a>                               |
| <b>CYP2C8*</b> | <a href="#">1558</a>  | Cytochrome P450<br>2C8                                                 | -                                                                                                                                            | -     | <a href="#">19710929</a> ,<br><a href="#">24269660</a>                               |
| <b>CYP2C9*</b> | <a href="#">1559</a>  | Cytochrome P450<br>2C9                                                 | -                                                                                                                                            | -     | <a href="#">19710929</a> ,<br><a href="#">24269660</a>                               |
| <b>CYP2J2*</b> | <a href="#">1573</a>  | Cytochrome P450<br>2J2                                                 | -                                                                                                                                            | -     | <a href="#">19710929</a> ,<br><a href="#">24269660</a>                               |
| <b>ELOVL5</b>  | <a href="#">60481</a> | Elongation of very<br>long chain fatty<br>acids protein 5              | Hexadecanoyl-ACP(c) + Malonyl-ACP(c) <=> 3-Oxostearoyl-ACP(c) + ACP(c) + CO2(c)                                                              | r1313 | <a href="#">18288265</a> ,<br><a href="#">16790840</a> ,<br><a href="#">15654130</a> |
| <b>ELOVL6</b>  | <a href="#">79071</a> | Elongation of very<br>long chain fatty<br>acids protein 6              | Hexadecanoyl-ACP(c) + Malonyl-ACP(c) <=> 3-Oxostearoyl-ACP(c) + ACP(c) + CO2(c)                                                              | r1313 | <a href="#">18288265</a> ,<br><a href="#">16790840</a> ,<br><a href="#">15654130</a> |
| <b>EPHX2*</b>  | <a href="#">2053</a>  | Bifunctional<br>epoxide hydrolase<br>2                                 | -                                                                                                                                            | -     | <a href="#">24269660</a>                                                             |

Maldonado *et al.* Supplementary Material

|               |                       |                                                                         |                                                                                                                                                                                                            |                                                    |                                                                                                                    |
|---------------|-----------------------|-------------------------------------------------------------------------|------------------------------------------------------------------------------------------------------------------------------------------------------------------------------------------------------------|----------------------------------------------------|--------------------------------------------------------------------------------------------------------------------|
| <b>ETFDH*</b> | <a href="#">2110</a>  | Electron transfer flavoprotein-ubiquinone oxidoreductase, mitochondrial | -                                                                                                                                                                                                          | -                                                  | <a href="#">19710929</a>                                                                                           |
| <b>FABP1</b>  | <a href="#">2168</a>  | Fatty acid-binding protein, liver                                       | Arachidonate(l) --> Arachidonate(r)<br>Arachidonate(l) <=> Arachidonate(c)<br>Palmitate(l) --> Palmitate(r)<br>Palmitate(l) <=> Palmitate(c)<br>Stearate(l) --> Stearate(r)<br>Stearate(l) <=> Stearate(c) | r0931<br>r0932<br>r0936<br>r0937<br>r0983<br>r0984 | <a href="#">19710929</a> ,<br><a href="#">18288265</a> ,<br><a href="#">10383430</a> ,<br><a href="#">11284737</a> |
| <b>FADS1*</b> | <a href="#">3992</a>  | Fatty acid desaturase 1                                                 | -                                                                                                                                                                                                          | -                                                  | <a href="#">18288265</a> ,<br><a href="#">16790840</a>                                                             |
| <b>FADS2*</b> | <a href="#">9415</a>  | Fatty acid desaturase 2                                                 | -                                                                                                                                                                                                          | -                                                  | <a href="#">18288265</a> ,<br><a href="#">16790840</a> ,<br><a href="#">12562861</a>                               |
| <b>FGF21*</b> | <a href="#">26291</a> | Fibroblast growth factor 21                                             | -                                                                                                                                                                                                          | -                                                  | <a href="#">19710929</a> ,<br><a href="#">17550777</a> ,<br><a href="#">17550778</a>                               |
| <b>G6PC</b>   | <a href="#">2538</a>  | Glucose-6-phosphatase                                                   | H <sub>2</sub> O(r) + Glucose-6P(r) --> Glucose(r) + Pi(r)                                                                                                                                                 | r0396                                              | <a href="#">19710929</a>                                                                                           |
| <b>GK</b>     | <a href="#">2710</a>  | Glycerol kinase                                                         | ATP(c) + Glycerol(c) <=> ADP(c) + sn-Glycerol-3P(c)<br>ATP(m) + Glycerol(m) <=> ADP(m) + sn-Glycerol-3P(m)                                                                                                 | r0203<br>r0204                                     | <a href="#">24269660</a>                                                                                           |

Maldonado *et al.* Supplementary Material

|               |                       |                                                       |                                                                                                                                                                                                                                                                                                                                                                                                                                                                                                                                                                                                                                      |                                                                                            |                                                                                                                                    |
|---------------|-----------------------|-------------------------------------------------------|--------------------------------------------------------------------------------------------------------------------------------------------------------------------------------------------------------------------------------------------------------------------------------------------------------------------------------------------------------------------------------------------------------------------------------------------------------------------------------------------------------------------------------------------------------------------------------------------------------------------------------------|--------------------------------------------------------------------------------------------|------------------------------------------------------------------------------------------------------------------------------------|
| <b>GLS2</b>   | <a href="#">27165</a> | Glutaminase liver isoform, mitochondrial              | Glutamine(m) + H2O(m) --> Glutamate(m) + NH3(m)                                                                                                                                                                                                                                                                                                                                                                                                                                                                                                                                                                                      | r0078                                                                                      | <a href="#">17164430</a>                                                                                                           |
| <b>GPAM</b>   | <a href="#">57678</a> | Glycerol-3-phosphate acyltransferase 1, mitochondrial | <p>Palmitoyl-CoA(c) + sn-Glycerol-3P(c) --&gt; CoA(c) + 1-Acylglycerol-3P-palm(c)</p> <p>(2E)-Hexadecenoyl-CoA(c) + sn-Glycerol-3P(c) --&gt; 1-Acylglycerol-3P-palmn(c) + CoA(c)</p> <p>Stearoyl-CoA(c) + sn-Glycerol-3P(c) --&gt; CoA(c) + 1-Acylglycerol-3P-stea(c)</p> <p>Oleoyl-CoA(c) + sn-Glycerol-3P(c) --&gt; 1-Acylglycerol-3P-ol(c) + CoA(c)</p> <p>Linoleoyl-CoA(c) + sn-Glycerol-3P(c) --&gt; 1-Acylglycerol-3P-lin(c) + CoA(c)</p> <p>Arachidonyl-CoA(c) + sn-Glycerol-3P(c) --&gt; 1-Acylglycerol-3P-arach(c) + CoA(c)</p> <p>Acyl-CoA-CL-pool(m) + sn-Glycerol-3P(m) --&gt; CoA(m) + 1-Acylglycerol-3P-CL-pool(m)</p> | <p>r1185</p> <p>r1186</p> <p>r1187</p> <p>r1188</p> <p>r1189</p> <p>r1190</p> <p>r1307</p> | <p><a href="#">19710929</a>,</p> <p><a href="#">18288265</a></p>                                                                   |
| <b>GPT</b>    | <a href="#">2875</a>  | Alanine aminotransferase 1                            | <p>Alanine(c) + AKG(c) &lt;=&gt; Pyruvate(c) + Glutamate(c)</p> <p>Alanine(m) + AKG(m) &lt;=&gt; Pyruvate(m) + Glutamate(m)</p>                                                                                                                                                                                                                                                                                                                                                                                                                                                                                                      | <p>r0080</p> <p>r0081</p>                                                                  | <a href="#">24269660</a>                                                                                                           |
| <b>HACL1*</b> | <a href="#">26061</a> | 2-hydroxyacyl-CoA lyase 1                             | -                                                                                                                                                                                                                                                                                                                                                                                                                                                                                                                                                                                                                                    | -                                                                                          | <a href="#">19710929</a>                                                                                                           |
| <b>HADHA</b>  | <a href="#">3030</a>  | Trifunctional enzyme subunit alpha, mitochondrial     | <p>(S)-3-Hydroxybutyryl-CoA(m) &lt;=&gt; Crotonyl-CoA(m) + H2O(m)</p> <p>3-Hydroxypropionyl-CoA(m) &lt;-- H2O(m) + Acrylyl-CoA(m)</p> <p>(S)-3-Hydroxydodecanoyl-CoA(m) &lt;=&gt; (2E)-Dodecenoyl-CoA(m) + H2O(m)</p> <p>(S)-3-Hydroxydodecanoyl-CoA(p) &lt;-- (2E)-Dodecenoyl-CoA(p) + H2O(p)</p> <p>(S)-3-Hydroxy-2-methylbutyryl-CoA(m) &lt;=&gt; H2O(m) + Tiglyl-CoA(m)</p> <p>Methacrylyl-CoA(m) + H2O(m) --&gt; 3-Hydroxyisobutyryl-CoA(m)</p>                                                                                                                                                                                 | <p>r0588</p> <p>r0592</p> <p>r0660</p> <p>r0661</p> <p>r0665</p> <p>r0669</p>              | <p><a href="#">19710929</a>,</p> <p><a href="#">18288265</a>,</p> <p><a href="#">17118139</a>,</p> <p><a href="#">16197558</a></p> |



Maldonado *et al.* Supplementary Material

|  |  |                                                                                     |       |  |
|--|--|-------------------------------------------------------------------------------------|-------|--|
|  |  | (S)-3-Hydroxyhexadecanoyl-CoA(m) <-- (2E)-Hexadecenoyl-CoA(m) + H2O(m)              | r0716 |  |
|  |  | (S)-3-Hydroxyhexadecanoyl-CoA(p) <-- (2E)-Hexadecenoyl-CoA(p) + H2O(p)              | r0717 |  |
|  |  | (S)-3-Hydroxytetradecanoyl-CoA(m) <-- (2E)-Tetradecenoyl-CoA(m) + H2O(m)            | r0720 |  |
|  |  | (S)-3-Hydroxytetradecanoyl-CoA(p) <-- (2E)-Tetradecenoyl-CoA(p) + H2O(p)            | r0721 |  |
|  |  | (S)-Hydroxydecanoyl-CoA(m) <=> (2E)-Decenoyl-CoA(m) + H2O(m)                        | r0728 |  |
|  |  | (S)-Hydroxydecanoyl-CoA(p) <-- (2E)-Decenoyl-CoA(p) + H2O(p)                        | r0729 |  |
|  |  | (S)-Hydroxyoctanoyl-CoA(m) <-- (2E)-Octenoyl-CoA(m) + H2O(m)                        | r0731 |  |
|  |  | (S)-Hydroxyhexanoyl-CoA(m) <-- (2E)-Hexenoyl-CoA(m) + H2O(m)                        | r0734 |  |
|  |  | NAD+(m) + (S)-3-Hydroxyhexadecanoyl-CoA(m) --> 3-Oxopalmitoyl-CoA(m) + NADH(m)      | r0714 |  |
|  |  | NAD+(p) + (S)-3-Hydroxyhexadecanoyl-CoA(p) --> 3-Oxopalmitoyl-CoA(p) + NADH(p)      | r0715 |  |
|  |  | (S)-3-Hydroxytetradecanoyl-CoA(m) + NAD+(m) --> 3-Oxotetradecanoyl-CoA(m) + NADH(m) | r0718 |  |
|  |  | (S)-3-Hydroxytetradecanoyl-CoA(p) + NAD+(p) --> 3-Oxotetradecanoyl-CoA(p) + NADH(p) | r0719 |  |
|  |  | (S)-3-Hydroxydodecanoyl-CoA(m) + NAD+(m) <=> 3-Oxododecanoyl-CoA(m) + NADH(m)       | r0722 |  |
|  |  | (S)-3-Hydroxydodecanoyl-CoA(p) + NAD+(p) --> 3-Oxododecanoyl-CoA(p) + NADH(p)       | r0723 |  |
|  |  | (S)-Hydroxydecanoyl-CoA(m) + NAD+(m) <=> 3-Oxodecanoyl-CoA(m) + NADH(m)             | r0726 |  |
|  |  |                                                                                     | r0727 |  |
|  |  |                                                                                     | r0730 |  |
|  |  |                                                                                     | r0733 |  |

Maldonado *et al.* Supplementary Material

|              |                      |                                                  |                                                                                                                                                                                                                                                                                                                                                                                                                                                                                                                                                                                                                                                                                                                                                                                                                                                                                                                                                                                                                                                                                                                                                              |                                                                                                                                                                          |                                                                                                   |
|--------------|----------------------|--------------------------------------------------|--------------------------------------------------------------------------------------------------------------------------------------------------------------------------------------------------------------------------------------------------------------------------------------------------------------------------------------------------------------------------------------------------------------------------------------------------------------------------------------------------------------------------------------------------------------------------------------------------------------------------------------------------------------------------------------------------------------------------------------------------------------------------------------------------------------------------------------------------------------------------------------------------------------------------------------------------------------------------------------------------------------------------------------------------------------------------------------------------------------------------------------------------------------|--------------------------------------------------------------------------------------------------------------------------------------------------------------------------|---------------------------------------------------------------------------------------------------|
|              |                      |                                                  | <p>(S)-Hydroxydecanoyl-CoA(p) + NAD+(p) --&gt; 3-Oxodecanoyl-CoA(p) + NADH(p)</p> <p>(S)-Hydroxyoctanoyl-CoA(m) + NAD+(m) --&gt; 3-Oxoctanoyl-CoA(m) + NADH(m)</p> <p>(S)-Hydroxyhexanoyl-CoA(m) + NAD+(m) --&gt; 3-Oxohexanoyl-CoA(m) + NADH(m)</p>                                                                                                                                                                                                                                                                                                                                                                                                                                                                                                                                                                                                                                                                                                                                                                                                                                                                                                         |                                                                                                                                                                          |                                                                                                   |
| <b>HADHB</b> | <a href="#">3032</a> | Trifunctional enzyme subunit beta, mitochondrial | <p>Propanoyl-CoA(m) + Acetyl-CoA(m) &lt;=&gt; CoA(m) + 2-Methylacetoacetyl-CoA(m)</p> <p>Acetyl-CoA(m) + Butyryl-CoA(m) &lt;-- CoA(m) + 3-Oxohexanoyl-CoA(m)</p> <p>Propanoyl-CoA(p) + Choloyl-CoA(p) &lt;-- CoA(p) + 3alpha,7alpha,12alpha-Trihydroxy-5beta-24-oxocholestanoyl-CoA(p)</p> <p>Acetyl-CoA(m) + Octanoyl-CoA(m) &lt;=&gt; CoA(m) + 3-Oxodecanoyl-CoA(m)</p> <p>Acetyl-CoA(p) + Octanoyl-CoA(p) &lt;-- CoA(p) + 3-Oxodecanoyl-CoA(p)</p> <p>Lauroyl-CoA(m) + Acetyl-CoA(m) &lt;-- CoA(m) + 3-Oxotetradecanoyl-CoA(m)</p> <p>Lauroyl-CoA(p) + Acetyl-CoA(p) &lt;-- CoA(p) + 3-Oxotetradecanoyl-CoA(p)</p> <p>Myristoyl-CoA(m) + Acetyl-CoA(m) &lt;-- CoA(m) + 3-Oxopalmitoyl-CoA(m)</p> <p>Myristoyl-CoA(p) + Acetyl-CoA(p) &lt;-- CoA(p) + 3-Oxopalmitoyl-CoA(p)</p> <p>Propanoyl-CoA(p) + Chenodeoxycholoyl-CoA(p) &lt;=&gt; CoA(p) + 3alpha,7alpha-Dihydroxy-5beta-cholestanoyl-CoA(p) + H2O(p)</p> <p>Decanoyl-CoA(m) + Acetyl-CoA(m) &lt;=&gt; CoA(m) + 3-Oxododecanoyl-CoA(m)</p> <p>Decanoyl-CoA(p) + Acetyl-CoA(p) &lt;-- CoA(p) + 3-Oxododecanoyl-CoA(p)</p> <p>Hexanoyl-CoA(m) + Acetyl-CoA(m) &lt;-- CoA(m) + 3-Oxoctanoyl-CoA(m)</p> | <p>r0222</p> <p>r0287</p> <p>r0628</p> <p>r0634</p> <p>r0635</p> <p>r0639</p> <p>r0640</p> <p>r0653</p> <p>r0654</p> <p>r0698</p> <p>r0724</p> <p>r0725</p> <p>r0732</p> | <p><a href="#">19710929</a>,</p> <p><a href="#">18288265</a>,</p> <p><a href="#">17118139</a></p> |

Maldonado *et al.* Supplementary Material

|                |                      |                                           |                                                                                                                                                                                                                                                                                                                                                                                                                                                                                                                                                                                                                                                                                                                                              |                                                                                                          |                                                                                                                                                 |
|----------------|----------------------|-------------------------------------------|----------------------------------------------------------------------------------------------------------------------------------------------------------------------------------------------------------------------------------------------------------------------------------------------------------------------------------------------------------------------------------------------------------------------------------------------------------------------------------------------------------------------------------------------------------------------------------------------------------------------------------------------------------------------------------------------------------------------------------------------|----------------------------------------------------------------------------------------------------------|-------------------------------------------------------------------------------------------------------------------------------------------------|
| <b>HMGCS1</b>  | <a href="#">3157</a> | HMG CoA synthase, cytoplasmic             | HMG-CoA(c) + CoA(c) <=> Acetyl-CoA(c) + H2O(c) + Acetoacetyl-CoA(c)<br>HMG-CoA(m) + CoA(m) <=> Acetyl-CoA(m) + H2O(m) + Acetoacetyl-CoA(m)<br>HMG-CoA(p) + CoA(p) <=> Acetyl-CoA(p) + H2O(p) + Acetoacetyl-CoA(p)                                                                                                                                                                                                                                                                                                                                                                                                                                                                                                                            | r0461<br>r0462<br>r0463                                                                                  | <a href="#">18288265</a>                                                                                                                        |
| <b>HMGCS2</b>  | <a href="#">3158</a> | HMG CoA synthase, mitochondrial           | HMG-CoA(c) + CoA(c) <=> Acetyl-CoA(c) + H2O(c) + Acetoacetyl-CoA(c)<br>HMG-CoA(m) + CoA(m) <=> Acetyl-CoA(m) + H2O(m) + Acetoacetyl-CoA(m)<br>HMG-CoA(p) + CoA(p) <=> Acetyl-CoA(p) + H2O(p) + Acetoacetyl-CoA(p)                                                                                                                                                                                                                                                                                                                                                                                                                                                                                                                            | r0461<br>r0462<br>r0463                                                                                  | <a href="#">19710929</a> ,<br><a href="#">18288265</a> ,<br><a href="#">10869548</a> ,<br><a href="#">12381268</a> ,<br><a href="#">7913466</a> |
| <b>HSD17B4</b> | <a href="#">3295</a> | Peroxisomal multifunctional enzyme type 2 | 3alpha,7alpha,12alpha,24-Tetrahydroxy-5beta-cholestanoyl-CoA(p) <--<br>3alpha,7alpha,12alpha-Trihydroxy-5beta-cholest-24-enoyl-CoA(p) + H2O(p)<br>(S)-3-Hydroxybutyryl-CoA(m) + NAD+(m) <=> NADH(m) + Acetoacetyl-CoA(m)<br>NAD+(m) + (S)-3-Hydroxyhexadecanoyl-CoA(m) --> 3-Oxopalmitoyl-CoA(m) + NADH(m)<br>NAD+(p) + (S)-3-Hydroxyhexadecanoyl-CoA(p) --> 3-Oxopalmitoyl-CoA(p) + NADH(p)<br>(S)-3-Hydroxytetradecanoyl-CoA(m) + NAD+(m) --> 3-Oxotetradecanoyl-CoA(m) + NADH(m)<br>(S)-3-Hydroxytetradecanoyl-CoA(p) + NAD+(p) --> 3-Oxotetradecanoyl-CoA(p) + NADH(p)<br>(S)-3-Hydroxydodecanoyl-CoA(m) + NAD+(m) <=> 3-Oxododecanoyl-CoA(m) + NADH(m)<br>(S)-3-Hydroxydodecanoyl-CoA(p) + NAD+(p) --> 3-Oxododecanoyl-CoA(p) + NADH(p) | r0744<br>r0460<br>r0714<br>r0715<br>r0718<br>r0719<br>r0722<br>r0723<br>r0726<br>r0727<br>r0733<br>r0743 | <a href="#">18288265</a> ,<br><a href="#">9771468</a>                                                                                           |

Maldonado *et al.* Supplementary Material

|             |                      |                 |                                                                                                                                                                                                                                                                                                                                                                                                                                                                                                                                                                                                                                                                                                                                                                                                        |                                                             |                          |
|-------------|----------------------|-----------------|--------------------------------------------------------------------------------------------------------------------------------------------------------------------------------------------------------------------------------------------------------------------------------------------------------------------------------------------------------------------------------------------------------------------------------------------------------------------------------------------------------------------------------------------------------------------------------------------------------------------------------------------------------------------------------------------------------------------------------------------------------------------------------------------------------|-------------------------------------------------------------|--------------------------|
|             |                      |                 | (S)-Hydroxydecanoyl-CoA(m) + NAD+(m) <=> 3-Oxodecanoyl-CoA(m) + NADH(m)<br>(S)-Hydroxydecanoyl-CoA(p) + NAD+(p) --> 3-Oxodecanoyl-CoA(p) + NADH(p)<br>(S)-Hydroxyhexanoyl-CoA(m) + NAD+(m) --> 3-Oxohehexanoyl-CoA(m) + NADH(m)<br>3alpha,7alpha,12alpha,24-Tetrahydroxy-5beta-cholestanoyl-CoA(p) + NAD+(p) --> 3alpha,7alpha,12alpha-Trihydroxy-5beta-24-oxocholestanoyl-CoA(p) + NADH(p)                                                                                                                                                                                                                                                                                                                                                                                                            |                                                             |                          |
| <b>LEPR</b> | <a href="#">3953</a> | Leptin receptor | -                                                                                                                                                                                                                                                                                                                                                                                                                                                                                                                                                                                                                                                                                                                                                                                                      | -                                                           | <a href="#">18288265</a> |
| <b>LIPC</b> | <a href="#">3990</a> | HTGL            | Triacylglycerol-VLDL-pool(c) + H2O(c) --> Fatty-acid-VLDL-TG3-pool(c) + 1,2-Diacylglycerol-VLDL-TG-pool(c)<br>H2O(c) + 1,2-Diacylglycerol-VLDL-TG-pool(c) --> 1-Acylglycerol-VLDL-TG1-pool(c) + Fatty-acid-VLDL-TG2-pool(c)<br>H2O(c) + 1,2-Diacylglycerol-VLDL-PC-pool(c) --> 1-Acylglycerol-VLDL-PC-pool(c) + Fatty-acid-VLDL-PC-pool(c)<br>H2O(c) + 1,2-Diacylglycerol-VLDL-PE-pool(c) --> 1-Acylglycerol-VLDL-PE-pool(c) + Fatty-acid-VLDL-PE-pool(c)<br>H2O(c) + 1,2-Diacylglycerol-VLDL-PS-pool(c) --> 1-Acylglycerol-VLDL-PS-pool(c) + Fatty-acid-VLDL-PS-pool(c)<br>H2O(c) + 1,2-Diacylglycerol-VLDL-PI-pool(c) --> 1-Acylglycerol-VLDL-PI-pool(c) + Fatty-acid-VLDL-PI-pool(c)<br>H2O(c) + 1,2-Diacylglycerol-VLDL-SM-pool(c) --> 1-Acylglycerol-VLDL-SM-pool(c) + Fatty-acid-VLDL-SM-pool(c) | r1224<br>r1225<br>r1226<br>r1227<br>r1228<br>r1229<br>r1230 | <a href="#">24269660</a> |

Maldonado *et al.* Supplementary Material

|               |                       |                                               |                                                                                                                      |                |                                                                                      |
|---------------|-----------------------|-----------------------------------------------|----------------------------------------------------------------------------------------------------------------------|----------------|--------------------------------------------------------------------------------------|
| <b>ME1</b>    | <a href="#">4199</a>  | NADP-dependent malic enzyme                   | Malate(c) + NADP+(c) <=> Pyruvate(c) + CO2(c) + NADPH(c)<br>Malate(m) + NADP+(m) <=> Pyruvate(m) + CO2(m) + NADPH(m) | r0058<br>r0059 | <a href="#">24269660</a>                                                             |
| <b>MGST3*</b> | <a href="#">4259</a>  | Microsomal GST-3                              | -                                                                                                                    | -              | <a href="#">19710929</a>                                                             |
| <b>NR1H3*</b> | <a href="#">10062</a> | LXR                                           | -                                                                                                                    | -              | <a href="#">12512040</a> ,<br><a href="#">10809236</a>                               |
| <b>NR1H4*</b> | <a href="#">9971</a>  | FXR                                           | -                                                                                                                    | -              | <a href="#">18288265</a>                                                             |
| <b>OAT</b>    | <a href="#">4942</a>  | Ornithine aminotransferase                    | AKG(m) + Ornithine(m) <=> L-Glutamate_5-semialdehyde(m) + Glutamate(m)                                               | r0167          | <a href="#">17164430</a>                                                             |
| <b>ODC1</b>   | <a href="#">4953</a>  | Ornithine decarboxylase                       | Ornithine(c) <=> Putrescine(c) + CO2(c)                                                                              | r0168          | <a href="#">17164430</a>                                                             |
| <b>OTC</b>    | <a href="#">5009</a>  | Ornithine carbamoyltransferase, mitochondrial | Carbamoyl-P(m) + Ornithine(m) <=> Pi(m) + Citrulline(m)                                                              | r0329          | <a href="#">24269660</a>                                                             |
| <b>PAH</b>    | <a href="#">5053</a>  | Phenylalanine-4-hydroxylase                   | Tetrahydrobiopterin(c) + Phenylalanine(c) + O2(c) <=> Dihydrobiopterin(c) + Tyrosine(c) + H2O(c)                     | r0399          | <a href="#">17164430</a>                                                             |
| <b>PCK1</b>   | <a href="#">5105</a>  | Phosphoenolpyruvate carboxykinase, cytosolic  | GTP(c) + OAA(c) --> GDP(c) + PEP(c) + CO2(c)                                                                         | r0123          | <a href="#">19710929</a>                                                             |
| <b>PDK4*</b>  | <a href="#">5166</a>  | Pyruvate dehydrogenase (acetyl-transferring)  | -                                                                                                                    | -              | <a href="#">19710929</a> ,<br><a href="#">18288265</a> ,<br><a href="#">12023878</a> |

Maldonado *et al.* Supplementary Material

|                 |                       |                                                       |                                                                                                                                                                                                                                                                                                             |                                  |                                                                                      |
|-----------------|-----------------------|-------------------------------------------------------|-------------------------------------------------------------------------------------------------------------------------------------------------------------------------------------------------------------------------------------------------------------------------------------------------------------|----------------------------------|--------------------------------------------------------------------------------------|
|                 |                       | kinase isozyme 4, mitochondrial                       |                                                                                                                                                                                                                                                                                                             |                                  |                                                                                      |
| <b>PCTP*</b>    | <a href="#">58488</a> | Phosphatidylcholine transfer protein                  | -                                                                                                                                                                                                                                                                                                           | -                                | <a href="#">19710929</a> ,<br><a href="#">18288265</a>                               |
| <b>PLTP*</b>    | <a href="#">5360</a>  | Phospholipid transfer protein                         | -                                                                                                                                                                                                                                                                                                           | -                                | <a href="#">18288265</a> ,<br><a href="#">11342537</a>                               |
| <b>PSAT1</b>    | <a href="#">29968</a> | Phosphoserine aminotransferase                        | 3-Phosphoserine(c) + AKG(c) <-- 3-Phosphonoxy pyruvate(c) + Glutamate(c)                                                                                                                                                                                                                                    | r0663                            | <a href="#">17164430</a>                                                             |
| <b>SCD</b>      | <a href="#">6319</a>  | Acyl-CoA desaturase                                   | Palmitoyl-CoA(c) + O2(c) + 2 Ferrocyclochrome_b5(c) <=> palmitoleoyl-CoA(c) + 2 Ferricyclochrome_b5(c) + 2 H2O(c)<br>Stearoyl-CoA(c) + O2(c) + 2 Ferrocyclochrome_b5(c) <=> Oleoyl-CoA(c) + 2 Ferricyclochrome_b5(c) + 2 H2O(c)<br>2 H2O(c) + NAD+(c) + Oleoyl-CoA(c) <=> NADH(c) + O2(c) + Stearoyl-CoA(c) | r0510<br>r0511<br>r1465          | <a href="#">18288265</a> ,<br><a href="#">8790349</a>                                |
| <b>SCP2</b>     | <a href="#">6342</a>  | Non-specific lipid-transfer protein                   | Propanoyl-CoA(p) + Choloyl-CoA(p) <-- CoA(p) + 3alpha,7alpha,12alpha-Trihydroxy-5beta-24-oxocholestanoyl-CoA(p)                                                                                                                                                                                             | r0628                            | <a href="#">24269660</a>                                                             |
| <b>SLC22A5</b>  | <a href="#">6584</a>  | Solute carrier family 22 member 5                     | Histamine(s) <=> Histamine(c)<br>Dopamine(s) <=> Dopamine(c)<br>Lysine(c) <=> Lysine(s)<br>Methionine(s) <=> Methionine(c)                                                                                                                                                                                  | r0952<br>r1009<br>r1069<br>r1072 | <a href="#">19710929</a> ,<br><a href="#">18288265</a> ,<br><a href="#">17692817</a> |
| <b>SLC25A20</b> | <a href="#">788</a>   | Mitochondrial carnitine/acylcarnitine carrier protein | L-Carnitine(c) + O-Acetylcarnitine(r) <=> L-Carnitine(r) + O-Acetylcarnitine(c)<br>L-Carnitine(m) + O-Acetylcarnitine(c) --> L-Carnitine(c) + O-Acetylcarnitine(m)<br>L-Carnitine(m) + L-Octanoylcarnitine(c) --> L-Carnitine(c) + L-Octanoylcarnitine(m)                                                   | r0995<br>r2433<br>r2434<br>r2435 | <a href="#">19710929</a> ,<br><a href="#">18288265</a>                               |

Maldonado *et al.* Supplementary Material

|         |                       |                                                                                  |                                                                                                                                                                                                                                                                                                                                                                                                                                                                                                                                                                                                                                                                                                                                                                                                        |                                                                                                                                                                                                                              |                                                                  |
|---------|-----------------------|----------------------------------------------------------------------------------|--------------------------------------------------------------------------------------------------------------------------------------------------------------------------------------------------------------------------------------------------------------------------------------------------------------------------------------------------------------------------------------------------------------------------------------------------------------------------------------------------------------------------------------------------------------------------------------------------------------------------------------------------------------------------------------------------------------------------------------------------------------------------------------------------------|------------------------------------------------------------------------------------------------------------------------------------------------------------------------------------------------------------------------------|------------------------------------------------------------------|
|         |                       |                                                                                  | <p>L-Carnitine(m) + L-Palmitoylcarnitine(c) --&gt; L-Carnitine(c) + L-Palmitoylcarnitine(m)</p> <p>L-Carnitine(m) + L-Oleoylcarnitine(c) --&gt; L-Carnitine(c) + L-Oleoylcarnitine(m)</p> <p>L-Carnitine(m) + O-Propanoylcarnitine(c) --&gt; L-Carnitine(c) + O-Propanoylcarnitine(m)</p> <p>L-Carnitine(m) + O-Butanoylcarnitine(c) --&gt; L-Carnitine(c) + O-Butanoylcarnitine(m)</p>                                                                                                                                                                                                                                                                                                                                                                                                                | <p>r2436</p> <p>r2437</p> <p>r2438</p>                                                                                                                                                                                       |                                                                  |
| SLC27A2 | <a href="#">11001</a> | Very long-chain acyl- CoA synthetase (aka Fatty acid transport protein 2, FATP2) | <p>Arachidonate(s) --&gt; Arachidonate(c)</p> <p>Palmitate(s) --&gt; Palmitate(c)</p> <p>Stearate(s) --&gt; Stearate(c)</p> <p>Stearate(l) --&gt; Stearate(r)</p> <p>Stearate(l) &lt;=&gt; Stearate(c)</p> <p>Linoleate(s) --&gt; Linoleate(c)</p> <p>gamma-Linolenate(s) --&gt; gamma-Linolenate(c)</p> <p>Oleate(s) --&gt; Oleate(c)</p> <p>Linolenate(s) --&gt; Linolenate(c)</p> <p>Dihomo-gamma-linolenate(s) --&gt; Dihomo-gamma-linolenate(c)</p> <p>Elaidate(s) --&gt; Elaidate(c)</p> <p>Lignocerate(s) --&gt; Lignocerate(c)</p> <p>Palmitolate(s) --&gt; Palmitolate(c)</p> <p>myristic-acid(s) --&gt; myristic-acid(c)</p> <p>Palmitate(r) + ATP(r) + CoA(r) --&gt; Palmitoyl-CoA(r) + AMP(r) + PPi(r)</p> <p>Palmitate(c) + ATP(c) + CoA(c) --&gt; Palmitoyl-CoA(c) + AMP(c) + PPi(c)</p> | <p>r0930</p> <p>r0935</p> <p>r0982</p> <p>r0983</p> <p>r0984</p> <p>r0985</p> <p>r1297</p> <p>r1300</p> <p>r1363</p> <p>r1366</p> <p>r2440</p> <p>r2441</p> <p>r2442</p> <p>r2445</p> <p>r0311</p> <p>r0312</p> <p>r1251</p> | <p><a href="#">18288265.</a></p> <p><a href="#">17118139</a></p> |

Maldonado *et al.* Supplementary Material

|  |  |                                                                                     |       |  |
|--|--|-------------------------------------------------------------------------------------|-------|--|
|  |  | Palmitolate(r) + ATP(r) + CoA(r) --> (2E)-Hexadecenoyl-CoA(r) + AMP(r) + PPI(r)     | r1252 |  |
|  |  | Palmitolate(c) + ATP(c) + CoA(c) --> (2E)-Hexadecenoyl-CoA(c) + AMP(c) + PPI(c)     | r1253 |  |
|  |  | Palmitolate(c) + ATP(c) + CoA(c) --> (2E)-Hexadecenoyl-CoA(c) + AMP(c) + PPI(c)     | r1254 |  |
|  |  | Stearate(r) + ATP(r) + CoA(r) --> Stearoyl-CoA(r) + AMP(r) + PPI(r)                 | r1255 |  |
|  |  | Stearate(c) + ATP(c) + CoA(c) --> Stearoyl-CoA(c) + AMP(c) + PPI(c)                 | r1256 |  |
|  |  | ATP(r) + CoA(r) + Oleate(r) --> Oleoyl-CoA(r) + AMP(r) + PPI(r)                     | r1257 |  |
|  |  | ATP(c) + CoA(c) + Oleate(c) --> Oleoyl-CoA(c) + AMP(c) + PPI(c)                     | r1258 |  |
|  |  | Linoleate(r) + ATP(r) + CoA(r) --> AMP(r) + PPI(r) + Linoleoyl-CoA(r)               | r1259 |  |
|  |  | Linoleate(c) + ATP(c) + CoA(c) --> AMP(c) + PPI(c) + Linoleoyl-CoA(c)               | r1260 |  |
|  |  | ATP(r) + CoA(r) + Linolenate(r) --> Linolenoyl-CoA(r) + AMP(r) + PPI(r)             | r1261 |  |
|  |  | gamma-Linolenate(r) + ATP(r) + CoA(r) --> gamma-Linolenoyl-CoA(r) + AMP(r) + PPI(r) | r1262 |  |
|  |  | gamma-Linolenate(c) + ATP(c) + CoA(c) --> gamma-Linolenoyl-CoA(c) + AMP(c) + PPI(c) | r1263 |  |
|  |  | Arachidonate(r) + ATP(r) + CoA(r) --> Arachidonyl-CoA(r) + AMP(r) + PPI(r)          | r1487 |  |
|  |  | Arachidonate(c) + ATP(c) + CoA(c) --> Arachidonyl-CoA(c) + AMP(c) + PPI(c)          | r1488 |  |
|  |  | ATP(r) + CoA(r) + Palmitolate(r) <=> AMP(r) + palmitoleoyl-CoA(r) + PPI(r)          |       |  |
|  |  | ATP(c) + CoA(c) + Palmitolate(c) <=> AMP(c) + palmitoleoyl-CoA(c) + PPI(c)          |       |  |



Maldonado *et al.* Supplementary Material

|                                                                       |                       |                                         |                                                                                 |                |                                                      |
|-----------------------------------------------------------------------|-----------------------|-----------------------------------------|---------------------------------------------------------------------------------|----------------|------------------------------------------------------|
| SLC27A4                                                               | <a href="#">10999</a> | Long-chain fatty acid transport protein | Arachidonate(s) --> Arachidonate(c)                                             | r0930          | <a href="#">19710929</a><br><a href="#">18288265</a> |
|                                                                       |                       |                                         | Palmitate(s) --> Palmitate(c)                                                   | r0935          |                                                      |
|                                                                       |                       |                                         | Stearate(s) --> Stearate(c)                                                     | r0982          |                                                      |
|                                                                       |                       |                                         | Stearate(l) --> Stearate(r)                                                     | r0983          |                                                      |
|                                                                       |                       |                                         | Stearate(l) <=> Stearate(c)                                                     | r0984          |                                                      |
|                                                                       |                       |                                         | Linoleate(s) --> Linoleate(c)                                                   | r0985          |                                                      |
|                                                                       |                       |                                         | gamma-Linolenate(s) --> gamma-Linolenate(c)                                     | r1297          |                                                      |
|                                                                       |                       |                                         | Oleate(s) --> Oleate(c)                                                         | r1300          |                                                      |
|                                                                       |                       |                                         | Linolenate(s) --> Linolenate(c)                                                 | r1363          |                                                      |
|                                                                       |                       |                                         | Dihomo-gamma-linolenate(s) --> Dihomo-gamma-linolenate(c)                       | r1366          |                                                      |
|                                                                       |                       |                                         | Elaidate(s) --> Elaidate(c)                                                     | r2440          |                                                      |
|                                                                       |                       |                                         | Palmitolate(s) --> Palmitolate(c)                                               | r2442          |                                                      |
|                                                                       |                       |                                         | myristic-acid(s) --> myristic-acid(c)                                           | r2445          |                                                      |
|                                                                       |                       |                                         | Palmitate(r) + ATP(r) + CoA(r) --> Palmitoyl-CoA(r) + AMP(r) + PPI(r)           | r0311          |                                                      |
|                                                                       |                       |                                         | Palmitate(c) + ATP(c) + CoA(c) --> Palmitoyl-CoA(c) + AMP(c) + PPI(c)           | r0312          |                                                      |
|                                                                       |                       |                                         | Palmitolate(r) + ATP(r) + CoA(r) --> (2E)-Hexadecenoyl-CoA(r) + AMP(r) + PPI(r) | r1251<br>r1252 |                                                      |
|                                                                       |                       |                                         | Palmitolate(c) + ATP(c) + CoA(c) --> (2E)-Hexadecenoyl-CoA(c) + AMP(c) + PPI(c) | r1253<br>r1254 |                                                      |
|                                                                       |                       |                                         | Stearate(r) + ATP(r) + CoA(r) --> Stearoyl-CoA(r) + AMP(r) + PPI(r)             | r1255          |                                                      |
|                                                                       |                       |                                         | Stearate(c) + ATP(c) + CoA(c) --> Stearoyl-CoA(c) + AMP(c) + PPI(c)             | r1256          |                                                      |
|                                                                       |                       |                                         | ATP(r) + CoA(r) + Oleate(r) --> Oleoyl-CoA(r) + AMP(r) + PPI(r)                 | r1257          |                                                      |
| ATP(c) + CoA(c) + Oleate(c) --> Oleoyl-CoA(c) + AMP(c) + PPI(c)       | r1258                 |                                         |                                                                                 |                |                                                      |
| Linoleate(r) + ATP(r) + CoA(r) --> AMP(r) + PPI(r) + Linoleoyl-CoA(r) | r1259                 |                                         |                                                                                 |                |                                                      |

Maldonado *et al.* Supplementary Material

|               |                       |                                       |                                                                                                                                                                                                                                                                                                                                                                                                                                                                                                                                                                                                                                                                                                                         |                                                                               |                                                                  |
|---------------|-----------------------|---------------------------------------|-------------------------------------------------------------------------------------------------------------------------------------------------------------------------------------------------------------------------------------------------------------------------------------------------------------------------------------------------------------------------------------------------------------------------------------------------------------------------------------------------------------------------------------------------------------------------------------------------------------------------------------------------------------------------------------------------------------------------|-------------------------------------------------------------------------------|------------------------------------------------------------------|
|               |                       |                                       | <p>Linoleate(c) + ATP(c) + CoA(c) --&gt; AMP(c) + PPi(c) + Linoleoyl-CoA(c)</p> <p>ATP(r) + CoA(r) + Linolenate(r) --&gt; Linolenoyl-CoA(r) + AMP(r) + PPi(r)</p> <p>gamma-Linolenate(r) + ATP(r) + CoA(r) --&gt; gamma-Linolenoyl-CoA(r) + AMP(r) + PPi(r)</p> <p>gamma-Linolenate(c) + ATP(c) + CoA(c) --&gt; gamma-Linolenoyl-CoA(c) + AMP(c) + PPi(c)</p> <p>Arachidonate(r) + ATP(r) + CoA(r) --&gt; Arachidonyl-CoA(r) + AMP(r) + PPi(r)</p> <p>Arachidonate(c) + ATP(c) + CoA(c) --&gt; Arachidonyl-CoA(c) + AMP(c) + PPi(c)</p> <p>ATP(r) + CoA(r) + Palmitolate(r) &lt;=&gt; AMP(r) + palmitoleoyl-CoA(r) + PPi(r)</p> <p>ATP(c) + CoA(c) + Palmitolate(c) &lt;=&gt; AMP(c) + palmitoleoyl-CoA(c) + PPi(c)</p> | <p>r1260</p> <p>r1261</p> <p>r1262</p> <p>r1263</p> <p>r1487</p> <p>r1488</p> |                                                                  |
| <b>TXNIP*</b> | <a href="#">10628</a> | Thioredoxin-interacting protein       | -                                                                                                                                                                                                                                                                                                                                                                                                                                                                                                                                                                                                                                                                                                                       | -                                                                             | <p><a href="#">19710929</a>,</p> <p><a href="#">18288265</a></p> |
| <b>UGT1A9</b> | <a href="#">54600</a> | UDPGT 1-9                             | Bilirubin(r) + 2 UDP-glucuronate(r) --> 2 UDP(r) + Bilirubin-bisglucuronoside(r)                                                                                                                                                                                                                                                                                                                                                                                                                                                                                                                                                                                                                                        | r0532                                                                         | <a href="#">24269660</a>                                         |
| <b>VLDLR</b>  | <a href="#">7436</a>  | Very low density lipoprotein receptor | VLDL(s) --> VLDL(l)                                                                                                                                                                                                                                                                                                                                                                                                                                                                                                                                                                                                                                                                                                     | r1084                                                                         | <p><a href="#">19710929</a>,</p> <p><a href="#">18288265</a></p> |

\*PPAR $\alpha$  target gene with no reaction represented within the HepatoNet1 GSMN

## REFERENCES

1. Kubota H *et al.* Temporal Coding of Insulin Action through Multiplexing of the AKT Pathway. *Mol Cell* **46** 820-832 (2012).
2. Gille C *et al.* HepatoNet1: a comprehensive metabolic reconstruction of the human hepatocyte for the analysis of liver physiology. *Mol Syst Biol* **6** 1-13 (2010).
3. Jain M *et al.* Metabolite Profiling Identifies a Key Role for Glycine in Rapid Cancer Cell Proliferation. *Science* **336** 1040-1044 (2012).
4. Heiner M, Herajy M, Liu F, Rohr C, and Schwarick M. Snoopy - A unifying Petri net tool. *Lecture Notes in Computer Science* **7347 LNCS** 398-407 (2012).
5. Fisher CP, Plant NJ, Moore JB, and Kierzek AM. QSSPN: dynamic simulation of molecular interaction networks describing gene regulation, signalling and whole-cell metabolism in human cells. *Bioinformatics* **29** 1-9 (2013).
6. Wu H *et al.* MUFINS : Multi-Formalism Interaction Network Simulator. *NPJ Systems Biol Appl* **2** 16032 (2016).
7. Baur H and Heldt HW. Transport of hexoses across the liver-cell membrane. *Eur J Biochem* **74** 397-403 (1977).
8. Lemonnier F, Feneant M, Moatti N, Gautier M, and Lemonnier A. D-glucose uptake in human liver cell cultures. *In Vitro* **17** 745-751 (1981).
9. Elliott KR and Craik JD. Sugar transport across the hepatocyte plasma membrane. *Biochem Soc Transact* **10** 12-13 (1982).
10. Mardones L *et al.* The glucose transporter-2 (GLUT2) is a low affinity dehydroascorbic acid transporter. *Biochem Biophys Res Comm* **410** 7-12 (2011).
11. Bell GI, Burant CF, Takeda J, and Gould GW. Structure and function of mammalian facilitative sugar transporters. *J Biol Chem* **268** 19161-19164 (1993).
12. Takanaga H, Chaudhuri B, and Frommer W. GLUT1 and GLUT9 as major contributors to glucose influx in HepG2 cells identified by a high sensitivity intramolecular FRET glucose sensor. *Biochimica et Biophysica acta* **1778** 1091-1099 (2008).
13. Guo L, Dial S, Shi L, Branham W, and Liu J. Similarities and differences in the expression of drug-metabolizing enzymes between human hepatic cell lines and primary human hepatocytes. *Drug Metabol Dispos* **39** 528-538 (2011).
14. Hirahatake K, Meissen J, Fiehn O, and Adams S. Comparative effects of fructose and glucose on lipogenic gene expression and intermediary metabolism in HepG2 liver cells. *PLoS ONE* **6** 1-9 (2011).
15. Levi J *et al.* Fluorescent fructose derivatives for imaging breast cancer cells. *Bioconjugate Chem* **18** 628-634 (2007).
16. Mueckler M and Thorens B. The SLC2 (GLUT) family of membrane transporters. *Mol Aspects Med* **34** 121-138 (2013).
17. Augustin R and Mayoux E. Mammalian Sugar Transporters. *Glucose Homeostasis: InTech*; 2014. pp. 3-36.
18. Li C *et al.* BioModels Database: An enhanced, curated and annotated resource for published quantitative kinetic models. *BMC Systems Biology* **4** 92 (2010).
19. Hoops S *et al.* COPASI - A COMplex PATHway Simulator. *Bioinformatics* **22** 3067-3074 (2006).
20. Peak M, Rochford JJ, Borthwick AC, Yeaman SJ, and Agius L. Signalling pathways involved in the stimulation of glycogen synthesis by insulin in rat hepatocytes. *Diabetologia* **41** 16-25 (1998).
21. Mostafalou S *et al.* Molecular mechanisms involved in lead induced disruption of hepatic and pancreatic glucose metabolism. *Environ Toxicol Pharmacol* **39** 16-26 (2015).

22. Barthel A and Schmolli D. Novel concepts in insulin regulation of hepatic gluconeogenesis. *Am J Physiol Endocrinol Metab* **285** E685-692 (2003).
23. Juty N *et al.* BioModels: Content, features, functionality, and use. *CPT Pharmacometrics Syst Pharmacol* **4** 55-68 (2015).
24. Lanaspá M *et al.* Endogenous fructose production and metabolism in the liver contributes to the development of metabolic syndrome. *Nat Commun* **4** 2434 (2013).
25. Mayes PA. Intermediary metabolism of fructose. *Am J Clin Nutr* **58** 754S-765S (1993).
26. Uhlen M *et al.* Tissue-based map of the human proteome. *Science* **347** 1260419-1260419 (2015).
27. Tazawa S *et al.* SLC5A9/SGLT4, a new Na<sup>+</sup>-dependent glucose transporter, is an essential transporter for mannose, 1,5-anhydro-D-glucitol, and fructose. *Life Sciences* **76** 1039-1050 (2005).
28. Thiele I *et al.* A community-driven global reconstruction of human metabolism. *Nat Biotechnol* **31** 419-425 (2013).
29. Nyberg SL *et al.* Primary hepatocytes outperform Hep G2 cells as the source of biotransformation functions in a bioartificial liver. *Annals Surg* **220** 59-67 (1994).
30. Kicic A, Chua ACG, and Baker E. Desferriethiocin is a more potent antineoplastic agent than desferrioxamine. *Brit J Pharmacol* **135** 1393-1402 (2002).
31. Hermes M, von Hippel S, Osswald H, and Kloor D. S-adenosylhomocysteine metabolism in different cell lines: effect of hypoxia and cell density. *Cell Physiol Biochem* **15** 233-244 (2005).
32. Norouzzadeh M, Kalikias Y, Mohamadpur Z, and Sharifi L. Determining population doubling time and the appropriate number of HepG2 cells for culturing in 6- well plate. *Int Res J Basic Appl Sci* **10** 299-303 (2016).
33. Stocchi V, Magnani M, Canestrari F, Dachà M, and Fornaini G. Multiple forms of human red blood cell hexokinase. Preparation, characterization, and age dependence. *J Biol Chem* **257** 2357-2364 (1982).
34. Tanimoto T, Ohta M, Tanaka A, Ikemoto I, and Machida T. Purification and characterization of human testis aldose and aldehyde reductase. *Int J Biochem* **23** 421-428 (1991).
35. Sato S, Old S, Carper D, and Kador PF. Purification and characterization of recombinant human placental and rat lens aldose reductases expressed in *Escherichia coli*. *Adv Exp Med Biol* **372** 259-268 (1995).
36. Brown KE *et al.* Immunodetection of aldose reductase in normal and diseased human liver. *Histol Histopathol* **20** 429-436 (2005).
37. Maldonado EM *et al.* Integration of Genome Scale Metabolic Networks and gene regulation of metabolic enzymes with Physiologically Based Pharmacokinetics. *PT Pharmacometrics Syst Pharmacol* (2017).
38. Mahadevan R and Schilling CH. The effects of alternate optimal solutions in constraint-based genome-scale metabolic models. *Metabol Eng* **5** 264-276 (2003).
39. Kanehisa M, Furumichi M, Tanabe M, Sato Y, and Morishima K. KEGG: new perspectives on genomes, pathways, diseases and drugs. *Nuc Acids Res* **45** D353-D361 (2017).
40. Nishimura D. BioCarta. *Biotech Software and Internet Report* **2** 117-120 (2001).
41. Huang da W, Sherman BT, and Lempicki RA. Systematic and integrative analysis of large gene lists using DAVID bioinformatics resources. *Nat Protoc* **4** 44-57 (2009).
42. Krzywinski M, Birol I, Jones SJM, and Marra MA. Hive plots—rational approach to visualizing networks. *Briefings in Bioinformatics* **13** 627-644 (2012).
43. Levy KJ, Mazzatti DJ, and Moore JB. Gene expression analyses of palmitate-induced steatosis in human hepatocytes. *Proc Nutr Soc* **69** (2010).
44. Spanos C *et al.* Proteomic characterization of dysregulated hepatic glyoxalase 1 in non-alcoholic fatty liver disease. *Proteome Sci.* **16**:4 (2018)

45. Lodish H, Berk A, and Zipursky S. The Molecules of Life. *Molecular Cell Biology*. 4th ed. New York: W. H. Freeman and Company; 2000.
46. Niklas J, Noor F, and Heinzle E. Effects of drugs in subtoxic concentrations on the metabolic fluxes in human hepatoma cell line Hep G2. *Toxicol Appl Pharmacol* **240** 327-336 (2009).
